# Supplementary material for: Power of Modified Brown-Forsythe and Mixed-Model Approaches in Split-Plot Designs
Source: Atypon-hosted journal article supplement (doi:10.1027/1614-2241/a000124), 2017-01-01
Supplement: 1614-2241_a000124_esm1.pdf [file 1614-2241_a000124_esm1.pdf]

Table 1: Percentages of Statistical Power when data are normally distributed  $(-1, 0, 1, 0)$  and without cutting.

| N  | R | OCS    | BF    |       |       | AIC   |       |       | CIM   |       |       |
|----|---|--------|-------|-------|-------|-------|-------|-------|-------|-------|-------|
|    |   |        | Bet   | Wit   | Int   | Bet   | Wit   | Int   | Bet   | Wit   | Int   |
| 30 | = | ARH(1) | 67.80 | 96.00 | 95.40 | 62.60 | 96.20 | 92.00 | 67.00 | 95.80 | 94.20 |
|    |   | RC     | 34.00 | 94.40 | 96.00 | 27.20 | 94.80 | 95.20 | 33.00 | 95.60 | 95.20 |
|    |   | UN     | 64.41 | 95.10 | 95.50 | 65.93 | 94.81 | 93.01 | 63.44 | 94.91 | 95.00 |
|    | + | ARH(1) | 63.80 | 95.20 | 95.40 | 65.00 | 94.40 | 94.80 | 64.40 | 94.80 | 95.00 |
|    |   | RC     | 25.80 | 96.20 | 96.20 | 23.80 | 97.40 | 93.80 | 25.40 | 97.00 | 95.60 |
|    |   | UN     | 61.44 | 96.60 | 97.00 | 69.83 | 97.30 | 94.31 | 61.84 | 96.60 | 96.00 |
|    | - | ARH(1) | 83.60 | 95.00 | 95.60 | 74.20 | 93.80 | 91.00 | 77.80 | 94.80 | 92.40 |
|    |   | RC     | 59.40 | 96.00 | 94.80 | 44.40 | 95.60 | 92.00 | 53.40 | 95.20 | 92.20 |
|    |   | UN     | 80.62 | 93.81 | 96.90 | 74.63 | 94.11 | 92.11 | 76.02 | 94.51 | 94.31 |
| 45 | = | ARH(1) | 50.60 | 94.60 | 94.40 | 47.40 | 94.40 | 92.20 | 50.80 | 94.60 | 93.00 |
|    |   | RC     | 9.60  | 95.60 | 96.20 | 7.00  | 95.00 | 95.80 | 9.20  | 95.00 | 96.40 |
|    |   | UN     | 45.05 | 95.20 | 96.00 | 52.85 | 94.81 | 93.71 | 45.15 | 94.91 | 95.10 |
|    | + | ARH(1) | 45.40 | 94.80 | 94.40 | 40.80 | 94.60 | 95.00 | 45.60 | 95.40 | 95.80 |
|    |   | RC     | 5.60  | 97.80 | 94.80 | 3.60  | 97.80 | 94.00 | 5.60  | 98.00 | 94.00 |
|    |   | UN     | 39.46 | 95.50 | 94.61 | 48.45 | 96.00 | 94.31 | 39.46 | 95.40 | 95.40 |
|    | - | ARH(1) | 69.00 | 95.40 | 95.00 | 64.00 | 95.00 | 95.00 | 65.80 | 95.00 | 94.20 |
|    |   | RC     | 29.20 | 94.20 | 96.00 | 20.80 | 94.20 | 95.00 | 27.40 | 94.40 | 94.00 |
|    |   | UN     | 62.34 | 95.10 | 95.10 | 63.84 | 94.71 | 92.71 | 60.14 | 94.81 | 93.51 |
| 60 | = | ARH(1) | 34.60 | 95.60 | 95.80 | 33.60 | 96.40 | 95.80 | 34.40 | 95.40 | 96.00 |
|    |   | RC     | 2.40  | 95.60 | 95.40 | 2.60  | 94.80 | 96.40 | 2.40  | 94.80 | 96.20 |
|    |   | UN     | 28.47 | 95.40 | 94.21 | 36.46 | 94.61 | 93.41 | 28.57 | 94.71 | 95.40 |
|    | + | ARH(1) | 29.40 | 95.60 | 94.80 | 27.20 | 94.80 | 94.20 | 30.97 | 96.10 | 96.30 |
|    |   | RC     | 2.00  | 94.80 | 95.60 | 1.20  | 94.80 | 95.00 | 2.20  | 94.80 | 96.00 |
|    |   | UN     | 28.57 | 94.71 | 95.40 | 23.58 | 95.90 | 95.50 | 33.97 | 96.10 | 94.21 |
|    | - | ARH(1) | 51.60 | 95.20 | 96.40 | 47.80 | 94.60 | 94.60 | 50.00 | 94.40 | 96.00 |
|    |   | RC     | 11.80 | 96.00 | 94.40 | 7.40  | 95.60 | 93.40 | 11.40 | 95.80 | 92.60 |
|    |   | UN     | 48.45 | 95.40 | 94.41 | 54.15 | 94.61 | 94.01 | 47.85 | 94.61 | 95.40 |

**Note:** Sample Size (N), Relationship between sample and dispersion matrix size (R), Null relation between sample and dispersion matrix size (=), Positive relation between sample and dispersion matrix size (+), Negative relation between sample and dispersion matrix size (-), Original Covariance Structure (OCS), Akaike's Information Criterion (AIC), Correctly Identified Model (MCI), Type I error rates exceeding Bradley's liberal criterion (Boldface).

Table 2: Percentages of Statistical Power when data are normally distributed  $(-1, 0, 0,1)$  and without cutting.

| N  | R | OCS     | BF    |       |       | AIC   |       |       | CIM   |       |       |
|----|---|---------|-------|-------|-------|-------|-------|-------|-------|-------|-------|
|    |   |         | Bet   | Wit   | Int   | Bet   | Wit   | Int   | Bet   | Wit   | Int   |
| 30 | = | ARH(1)  | 78.80 | 94.80 | 95.60 | 77.40 | 93.00 | 95.60 | 78.40 | 94.20 | 96.40 |
|    |   | RC      | 59.00 | 95.60 | 96.20 | 52.80 | 94.20 | 96.00 | 58.20 | 96.00 | 95.60 |
|    |   | UN      | 79.60 | 94.40 | 96.80 | 77.80 | 94.60 | 96.80 | 78.80 | 95.60 | 96.60 |
|    | + | ARH (1) | 75.80 | 96.60 | 94.80 | 78.20 | 96.20 | 95.40 | 76.00 | 95.40 | 95.60 |
|    |   | RC      | 55.20 | 94.80 | 95.40 | 51.60 | 95.60 | 94.20 | 55.00 | 95.40 | 95.40 |
|    |   | UN      | 76.20 | 94.40 | 93.60 | 80.00 | 91.60 | 93.00 | 76.60 | 94.20 | 93.40 |
|    | - | ARH (1) | 84.20 | 95.40 | 96.80 | 78.80 | 96.20 | 93.20 | 80.80 | 96.00 | 92.40 |
|    |   | RC      | 78.40 | 94.00 | 96.40 | 62.20 | 94.00 | 93.60 | 74.20 | 94.40 | 93.60 |
|    |   | UN      | 86.80 | 97.20 | 94.60 | 77.00 | 90.60 | 95.20 | 81.80 | 92.40 | 96.00 |
| 45 | = | ARH(1)  | 63.20 | 96.20 | 96.40 | 63.40 | 96.20 | 95.00 | 62.60 | 96.20 | 95.00 |
|    |   | RC      | 37.60 | 95.20 | 96.60 | 33.40 | 93.40 | 95.20 | 37.20 | 93.60 | 96.20 |
|    |   | UN      | 65.80 | 94.80 | 95.80 | 67.00 | 93.20 | 95.20 | 65.60 | 94.20 | 95.40 |
|    | + | ARH (1) | 57.80 | 95.00 | 95.80 | 58.20 | 95.80 | 95.80 | 57.80 | 95.80 | 95.20 |
|    |   | RC      | 30.60 | 94.00 | 94.80 | 27.80 | 95.40 | 96.00 | 30.20 | 93.60 | 96.00 |
|    |   | UN      | 59.80 | 95.80 | 96.40 | 64.00 | 95.00 | 96.60 | 60.00 | 95.40 | 97.00 |
|    | - | ARH (1) | 77.60 | 94.40 | 96.60 | 76.40 | 94.00 | 96.60 | 76.40 | 93.40 | 94.60 |
|    |   | RC      | 56.40 | 96.00 | 95.20 | 50.80 | 93.40 | 95.40 | 54.00 | 93.20 | 95.40 |
|    |   | UN      | 79.00 | 94.80 | 95.40 | 76.80 | 94.40 | 94.60 | 75.20 | 95.40 | 95.40 |
| 60 | = | ARH(1)  | 50.00 | 94.40 | 94.60 | 50.20 | 94.40 | 94.40 | 49.80 | 94.20 | 94.00 |
|    |   | RC      | 21.40 | 95.80 | 94.40 | 19.80 | 95.00 | 95.20 | 21.00 | 96.20 | 95.20 |
|    |   | UN      | 50.40 | 96.00 | 95.60 | 54.60 | 96.20 | 96.20 | 50.80 | 96.00 | 96.40 |
|    | + | ARH (1) | 46.40 | 94.40 | 94.40 | 46.60 | 93.80 | 94.20 | 46.20 | 94.00 | 95.00 |
|    |   | RC      | 12.40 | 96.40 | 94.60 | 11.00 | 95.60 | 95.00 | 12.60 | 96.00 | 95.00 |
|    |   | UN      | 47.20 | 94.20 | 93.40 | 51.00 | 93.00 | 92.80 | 47.00 | 94.80 | 92.40 |
|    | - | ARH (1) | 67.20 | 95.00 | 95.00 | 64.20 | 95.20 | 93.80 | 66.00 | 95.40 | 94.20 |
|    |   | RC      | 39.60 | 96.00 | 93.80 | 32.40 | 96.00 | 93.60 | 37.60 | 94.80 | 93.60 |
|    |   | UN      | 69.40 | 95.80 | 95.00 | 69.20 | 95.00 | 95.00 | 67.40 | 94.40 | 96.00 |

**Note:** Sample Size (N), Relationship between sample and dispersion matrix size (R), Null relation between sample and dispersion matrix size (=), Positive relation between sample and dispersion matrix size (+), Negative relation between sample and dispersion matrix size (-), Original Covariance Structure (OCS), Akaike's Information Criterion (AIC), Correctly Identified Model (MCI), Type I error rates exceeding Bradley's liberal criterion (Boldface).

Table 3: Percentages of Statistical Power when data are normally distributed  $(-1, 0, 1, 0)$  with cutting at 0.1.

| N  | R | OCS    | BF    |       |       | AIC   |       |       | CIM   |       |       |
|----|---|--------|-------|-------|-------|-------|-------|-------|-------|-------|-------|
|    |   |        | Bet   | Wit   | Int   | Bet   | Wit   | Int   | Bet   | Wit   | Int   |
| 30 | = | ARH(1) | 69.33 | 96.10 | 95.60 | 63.84 | 96.20 | 94.21 | 68.53 | 96.30 | 95.40 |
|    |   | RC     | 30.07 | 95.60 | 95.00 | 23.68 | 95.50 | 93.01 | 28.97 | 95.60 | 94.91 |
|    |   | UN     | 65.35 | 96.20 | 95.60 | 68.83 | 96.60 | 92.81 | 64.54 | 96.60 | 96.20 |
|    | + | ARH(1) | 65.54 | 95.20 | 95.20 | 65.63 | 96.00 | 94.11 | 64.48 | 95.90 | 95.50 |
|    |   | RC     | 23.98 | 95.80 | 95.90 | 22.68 | 95.50 | 95.10 | 23.88 | 95.70 | 95.80 |
|    |   | UN     | 59.94 | 94.41 | 96.00 | 68.33 | 95.10 | 93.41 | 59.44 | 94.41 | 95.40 |
|    | - | ARH(1) | 81.62 | 95.30 | 96.60 | 72.33 | 94.61 | 92.61 | 76.92 | 95.40 | 91.71 |
|    |   | RC     | 57.74 | 94.41 | 94.41 | 42.86 | 93.21 | 92.01 | 51.35 | 93.81 | 91.91 |
|    |   | UN     | 78.72 | 95.40 | 95.50 | 72.33 | 94.81 | 90.31 | 73.43 | 94.81 | 91.81 |
| 45 | = | ARH(1) | 51.01 | 94.91 | 95.10 | 48.35 | 94.81 | 95.60 | 50.85 | 94.71 | 95.50 |
|    |   | RC     | 10.39 | 96.10 | 95.40 | 7.69  | 95.70 | 94.41 | 10.29 | 95.70 | 95.20 |
|    |   | UN     | 44.66 | 93.61 | 95.20 | 53.45 | 93.71 | 94.41 | 44.16 | 93.91 | 95.40 |
|    | + | ARH(1) | 47.15 | 94.91 | 96.10 | 45.55 | 95.10 | 95.50 | 47.05 | 95.00 | 95.90 |
|    |   | RC     | 6.29  | 96.00 | 95.80 | 5.69  | 96.70 | 95.50 | 6.29  | 96.60 | 95.30 |
|    |   | UN     | 40.06 | 94.41 | 95.70 | 50.65 | 94.51 | 94.01 | 40.26 | 94.71 | 95.00 |
|    | - | ARH(1) | 68.53 | 94.31 | 96.80 | 62.44 | 93.71 | 94.61 | 65.73 | 93.71 | 95.30 |
|    |   | RC     | 28.77 | 95.10 | 96.10 | 17.98 | 94.91 | 94.41 | 25.97 | 95.10 | 93.81 |
|    |   | UN     | 67.13 | 95.20 | 95.70 | 68.43 | 94.21 | 92.81 | 63.94 | 94.51 | 93.71 |
| 60 | = | ARH(1) | 36.56 | 95.50 | 96.30 | 34.77 | 96.20 | 95.30 | 36.56 | 96.20 | 94.81 |
|    |   | RC     | 2.50  | 94.91 | 94.71 | 1.50  | 94.01 | 94.71 | 2.60  | 94.21 | 95.20 |
|    |   | UN     | 27.77 | 94.21 | 95.70 | 36.46 | 93.91 | 94.61 | 27.87 | 93.81 | 95.50 |
|    | + | ARH(1) | 29.27 | 96.20 | 95.90 | 27.17 | 95.60 | 94.91 | 29.27 | 95.20 | 95.20 |
|    |   | RC     | 2.00  | 95.70 | 95.60 | 1.50  | 96.10 | 95.70 | 1.90  | 96.00 | 96.30 |
|    |   | UN     | 24.88 | 95.20 | 94.51 | 32.77 | 94.41 | 93.01 | 24.78 | 94.71 | 93.81 |
|    | - | ARH(1) | 52.35 | 94.91 | 94.81 | 48.15 | 95.00 | 94.31 | 51.65 | 95.00 | 94.61 |
|    |   | RC     | 13.09 | 95.30 | 95.40 | 8.89  | 95.20 | 94.61 | 12.39 | 95.10 | 94.11 |
|    |   | UN     | 50.75 | 94.21 | 95.10 | 53.45 | 94.31 | 93.71 | 49.15 | 95.00 | 94.41 |

**Note:** Sample Size (N), Relationship between sample and dispersion matrix size (R), Null relation between sample and dispersion matrix size (=), Positive relation between sample and dispersion matrix size (+), Negative relation between sample and dispersion matrix size (-), Original Covariance Structure (OCS), Akaike's Information Criterion (AIC), Correctly Identified Model (MCI), Type I error rates exceeding Bradley's liberal criterion (Boldface).

Table 4: Percentages of Statistical Power when data are normally distributed  $(-1, 0, 1, 0)$  with cutting at 0.2.

| N  | R | OCS     | BF    |       |       | AIC   |       |       | CIM   |       |       |
|----|---|---------|-------|-------|-------|-------|-------|-------|-------|-------|-------|
|    |   |         | Bet   | Wit   | Int   | Bet   | Wit   | Int   | Bet   | Wit   | Int   |
| 30 | = | ARH(1)  | 67.93 | 95.30 | 94.91 | 63.64 | 95.60 | 94.21 | 67.43 | 95.80 | 95.20 |
|    |   | RC      | 30.57 | 94.51 | 95.40 | 25.97 | 94.41 | 93.71 | 27.97 | 94.91 | 94.81 |
|    |   | UN      | 64.24 | 93.81 | 95.50 | 67.23 | 95.10 | 93.51 | 63.34 | 94.31 | 94.91 |
|    | + | ARH (1) | 65.83 | 94.71 | 94.81 | 64.54 | 95.40 | 95.40 | 65.53 | 95.30 | 95.20 |
|    |   | RC      | 24.08 | 96.10 | 96.00 | 22.98 | 96.30 | 95.80 | 23.88 | 96.30 | 95.60 |
|    |   | UN      | 61.46 | 95.50 | 95.10 | 68.93 | 96.20 | 94.71 | 61.24 | 95.90 | 96.20 |
|    | - | ARH (1) | 83.12 | 95.10 | 97.10 | 74.63 | 95.20 | 93.31 | 77.62 | 95.40 | 92.51 |
|    |   | RC      | 57.94 | 94.41 | 97.10 | 41.76 | 94.11 | 92.91 | 51.75 | 94.51 | 93.71 |
|    |   | UN      | 80.62 | 96.30 | 96.10 | 75.02 | 95.00 | 91.81 | 75.42 | 95.70 | 92.71 |
| 45 | = | ARH(1)  | 52.25 | 94.81 | 95.50 | 50.95 | 94.81 | 94.91 | 51.75 | 94.61 | 96.00 |
|    |   | RC      | 8.09  | 95.10 | 95.60 | 7.39  | 95.10 | 95.20 | 8.19  | 95.20 | 95.40 |
|    |   | UN      | 41.86 | 95.20 | 95.10 | 48.85 | 94.61 | 94.91 | 41.46 | 94.51 | 95.30 |
|    | + | ARH (1) | 43.66 | 94.21 | 95.60 | 41.86 | 94.41 | 94.81 | 43.86 | 94.11 | 95.00 |
|    |   | RC      | 7.19  | 95.40 | 94.91 | 6.09  | 94.11 | 95.20 | 7.19  | 94.01 | 94.91 |
|    |   | UN      | 36.66 | 96.40 | 95.00 | 45.05 | 96.20 | 93.61 | 36.66 | 95.80 | 94.71 |
|    | - | ARH (1) | 67.73 | 94.81 | 95.80 | 63.44 | 94.41 | 94.41 | 65.33 | 94.51 | 93.31 |
|    |   | RC      | 30.27 | 95.40 | 95.30 | 18.18 | 94.71 | 93.81 | 26.67 | 94.61 | 94.01 |
|    |   | UN      | 63.14 | 94.61 | 96.40 | 65.03 | 93.81 | 94.21 | 60.24 | 93.91 | 94.21 |
| 60 | = | ARH(1)  | 37.56 | 94.61 | 94.21 | 33.77 | 94.71 | 94.21 | 37.46 | 94.91 | 94.61 |
|    |   | RC      | 2.40  | 96.00 | 95.90 | 1.70  | 96.00 | 95.00 | 2.40  | 96.00 | 95.20 |
|    |   | UN      | 27.37 | 94.51 | 93.11 | 35.26 | 94.01 | 93.51 | 27.47 | 94.41 | 93.81 |
|    | + | ARH (1) | 32.97 | 95.60 | 95.60 | 30.87 | 96.00 | 95.90 | 33.17 | 95.80 | 95.10 |
|    |   | RC      | 1.70  | 93.51 | 95.20 | 1.00  | 94.31 | 94.71 | 1.70  | 94.51 | 94.61 |
|    |   | UN      | 22.68 | 94.71 | 95.80 | 32.07 | 95.20 | 95.40 | 22.88 | 95.30 | 95.60 |
|    | - | ARH (1) | 52.85 | 93.91 | 95.20 | 48.51 | 93.91 | 95.20 | 51.05 | 94.01 | 95.20 |
|    |   | RC      | 11.69 | 94.81 | 95.10 | 7.99  | 94.11 | 95.20 | 11.19 | 94.31 | 94.71 |
|    |   | UN      | 50.55 | 95.90 | 96.20 | 55.84 | 95.80 | 93.81 | 49.35 | 95.80 | 94.11 |

**Note:** Sample Size (N), Relationship between sample and dispersion matrix size (R), Null relation between sample and dispersion matrix size (=), Positive relation between sample and dispersion matrix size (+), Negative relation between sample and dispersion matrix size (-), Original Covariance

Structure (OCS), Akaike's Information Criterion (AIC), Correctly Identified Model (MCI), Type I error rates exceeding Bradley's liberal criterion (Boldface).

Table 5: Percentages of Statistical Power when data are normally distributed  $(-1, 0, 0, 1)$  with cutting at 0.1.

| N  | R | OCS     | BF    |       |       | AIC   |       |       | CIM   |       |       |
|----|---|---------|-------|-------|-------|-------|-------|-------|-------|-------|-------|
|    |   |         | Bet   | Wit   | Int   | Bet   | Wit   | Int   | Bet   | Wit   | Int   |
| 30 | = | ARH(1)  | 77.12 | 95.40 | 96.00 | 75.72 | 95.30 | 94.01 | 77.12 | 95.40 | 96.10 |
|    |   | RC      | 41.16 | 94.21 | 96.30 | 51.95 | 94.21 | 94.71 | 58.54 | 94.41 | 95.60 |
|    |   | UN      | 77.22 | 96.80 | 93.61 | 75.82 | 95.80 | 91.91 | 76.92 | 95.50 | 94.61 |
|    | + | ARH (1) | 74.33 | 95.00 | 95.80 | 75.32 | 95.40 | 95.10 | 74.23 | 94.81 | 95.60 |
|    |   | RC      | 48.25 | 94.61 | 95.30 | 47.55 | 95.20 | 94.71 | 51.85 | 94.71 | 95.70 |
|    |   | UN      | 77.92 | 96.60 | 96.80 | 78.62 | 96.90 | 95.50 | 77.72 | 96.40 | 95.10 |
|    | - | ARH (1) | 86.51 | 95.50 | 96.20 | 79.82 | 95.00 | 93.61 | 82.92 | 95.60 | 94.21 |
|    |   | RC      | 77.12 | 95.70 | 96.40 | 63.64 | 95.60 | 93.61 | 71.93 | 95.90 | 92.51 |
|    |   | UN      | 88.01 | 95.80 | 96.20 | 80.22 | 95.00 | 91.41 | 84.02 | 95.20 | 93.41 |
| 45 | = | ARH(1)  | 59.64 | 95.20 | 94.81 | 55.74 | 94.91 | 93.21 | 59.04 | 94.91 | 93.81 |
|    |   | RC      | 36.36 | 94.81 | 95.80 | 32.87 | 95.30 | 94.71 | 36.26 | 95.30 | 95.20 |
|    |   | UN      | 63.74 | 95.80 | 95.60 | 66.53 | 95.90 | 93.71 | 63.24 | 95.70 | 95.10 |
|    | + | ARH (1) | 61.04 | 95.50 | 94.41 | 61.64 | 94.71 | 95.30 | 60.94 | 94.51 | 95.60 |
|    |   | RC      | 29.57 | 93.91 | 94.81 | 27.27 | 94.21 | 94.41 | 29.27 | 94.21 | 95.40 |
|    |   | UN      | 59.74 | 95.40 | 94.81 | 63.24 | 95.00 | 94.11 | 59.54 | 95.30 | 94.91 |
|    | - | ARH (1) | 76.72 | 95.60 | 94.51 | 72.43 | 95.20 | 93.01 | 74.43 | 94.41 | 94.01 |
|    |   | RC      | 59.84 | 95.30 | 95.40 | 50.05 | 94.41 | 94.31 | 56.94 | 94.31 | 95.60 |
|    |   | UN      | 76.42 | 94.01 | 95.10 | 73.93 | 93.21 | 91.71 | 74.73 | 93.61 | 93.51 |
| 60 | = | ARH(1)  | 50.55 | 94.31 | 95.70 | 49.55 | 94.71 | 95.80 | 50.35 | 94.81 | 95.20 |
|    |   | RC      | 20.18 | 96.90 | 95.20 | 17.48 | 96.00 | 94.61 | 20.08 | 96.00 | 95.10 |
|    |   | UN      | 54.15 | 95.90 | 96.20 | 55.74 | 95.20 | 95.90 | 54.25 | 95.20 | 96.60 |
|    | + | ARH (1) | 46.25 | 95.10 | 94.81 | 47.85 | 94.71 | 95.70 | 46.25 | 95.20 | 95.30 |
|    |   | RC      | 14.49 | 96.00 | 95.40 | 12.99 | 95.60 | 94.41 | 14.49 | 95.60 | 95.40 |
|    |   | UN      | 48.55 | 95.60 | 95.40 | 51.75 | 94.41 | 94.11 | 48.65 | 94.61 | 94.51 |
|    | - | ARH (1) | 63.44 | 95.10 | 95.30 | 62.14 | 95.30 | 95.30 | 62.44 | 95.30 | 95.10 |
|    |   | RC      | 39.06 | 94.81 | 95.00 | 31.27 | 94.71 | 94.31 | 37.86 | 94.91 | 93.71 |
|    |   | UN      | 66.73 | 95.30 | 95.70 | 65.53 | 94.21 | 94.31 | 65.53 | 94.51 | 94.11 |

**Note:** Sample Size (N), Relationship between sample and dispersion matrix size (R), Null relation between sample and dispersion matrix size (=), Positive relation between sample and dispersion matrix size (+), Negative relation between sample and dispersion matrix size (-), Original Covariance

Structure (OCS), Akaike's Information Criterion (AIC), Correctly Identified Model (MCI), Type I error rates exceeding Bradley's liberal criterion (Boldface).

Table 6: Percentages of Statistical Power when data are normally distributed  $(-1, 0, 0, 1)$  with cutting at 0.2.

| N  | R | OCS     | BF    |       |       | AIC   |       |       | CIM   |       |       |
|----|---|---------|-------|-------|-------|-------|-------|-------|-------|-------|-------|
|    |   |         | Bet   | Wit   | Int   | Bet   | Wit   | Int   | Bet   | Wit   | Int   |
|    |   |         | 2     | 1     | 3     | 5     | 4     | 6     | 8     | 7     | 9     |
| 30 | = | ARH(1)  | 79.22 | 94.71 | 95.60 | 76.42 | 94.71 | 93.41 | 78.32 | 94.31 | 93.81 |
|    |   | RC      | 59.84 | 93.71 | 95.60 | 53.15 | 94.41 | 94.41 | 58.84 | 94.21 | 95.50 |
|    |   | UN      | 75.92 | 95.30 | 95.20 | 76.02 | 94.01 | 93.61 | 75.52 | 95.30 | 94.61 |
|    | + | ARH (1) | 74.33 | 95.30 | 95.10 | 76.42 | 96.50 | 94.21 | 74.63 | 96.50 | 96.00 |
|    |   | RC      | 51.55 | 95.80 | 96.00 | 48.35 | 96.00 | 95.10 | 51.85 | 95.60 | 95.70 |
|    |   | UN      | 76.92 | 95.30 | 95.50 | 77.32 | 95.80 | 93.61 | 76.52 | 95.90 | 95.20 |
|    | - | ARH (1) | 85.61 | 95.50 | 96.10 | 81.12 | 95.30 | 93.11 | 82.82 | 95.30 | 93.21 |
|    |   | RC      | 78.62 | 94.91 | 96.90 | 64.84 | 94.61 | 93.11 | 73.93 | 94.61 | 92.81 |
|    |   | UN      | 87.91 | 94.91 | 96.70 | 80.82 | 93.91 | 91.21 | 83.82 | 94.81 | 94.41 |
| 45 | = | ARH(1)  | 63.64 | 95.20 | 94.91 | 61.54 | 95.00 | 94.81 | 63.44 | 95.00 | 94.31 |
|    |   | RC      | 38.96 | 96.20 | 95.00 | 34.57 | 94.51 | 94.41 | 38.76 | 94.51 | 94.71 |
|    |   | UN      | 67.53 | 96.90 | 94.81 | 68.43 | 95.90 | 93.31 | 63.93 | 95.60 | 94.51 |
|    | + | ARH (1) | 56.04 | 95.00 | 95.70 | 56.84 | 95.10 | 95.10 | 55.84 | 94.91 | 95.30 |
|    |   | RC      | 30.87 | 94.71 | 95.10 | 27.07 | 95.10 | 95.50 | 30.87 | 95.00 | 94.81 |
|    |   | UN      | 58.24 | 94.71 | 95.00 | 62.54 | 94.71 | 94.61 | 58.14 | 94.71 | 94.81 |
|    | - | ARH (1) | 76.82 | 95.60 | 95.50 | 75.72 | 94.91 | 93.41 | 75.22 | 94.71 | 94.61 |
|    |   | RC      | 56.04 | 94.31 | 95.40 | 47.75 | 95.20 | 93.31 | 53.75 | 95.30 | 93.71 |
|    |   | UN      | 78.42 | 94.91 | 96.20 | 75.22 | 94.41 | 94.11 | 76.42 | 94.51 | 94.91 |
| 60 | = | ARH(1)  | 49.25 | 95.50 | 94.11 | 50.05 | 95.30 | 94.51 | 49.35 | 95.30 | 94.71 |
|    |   | RC      | 21.48 | 94.81 | 95.40 | 18.48 | 94.21 | 94.91 | 21.58 | 94.21 | 94.91 |
|    |   | UN      | 52.35 | 95.30 | 95.10 | 56.04 | 94.71 | 94.11 | 52.35 | 94.81 | 95.10 |
|    | + | ARH (1) | 43.56 | 95.20 | 95.70 | 44.26 | 94.41 | 95.90 | 43.46 | 94.41 | 95.80 |
|    |   | RC      | 16.78 | 94.81 | 95.60 | 14.39 | 94.31 | 95.50 | 16.88 | 94.21 | 95.10 |
|    |   | UN      | 46.35 | 94.61 | 95.30 | 50.35 | 94.51 | 93.61 | 46.35 | 94.41 | 95.20 |
|    | - | ARH (1) | 63.94 | 95.70 | 95.30 | 63.44 | 95.90 | 94.71 | 63.54 | 95.90 | 94.21 |
|    |   | RC      | 36.86 | 95.50 | 95.60 | 31.67 | 95.70 | 94.51 | 36.06 | 95.70 | 94.81 |
|    |   | UN      | 69.93 | 95.60 | 95.60 | 69.43 | 94.31 | 93.81 | 68.93 | 94.71 | 94.11 |

**Note:** Sample Size (N), Relationship between sample and dispersion matrix size (R), Null relation between sample and dispersion matrix size (=), Positive relation between sample and dispersion matrix size (+), Negative relation between sample and dispersion matrix size (-), Original Covariance Structure (OCS), Akaike's Information Criterion (AIC), Correctly Identified Model (MCI), Type I error rates exceeding Bradley's liberal criterion (Boldface).

Table 7: Percentages of Power when data are normally distributed (Without Skewness -1,1,0,0) and without trimmed for covariance structures selecting

| N  | R | OCS     | BF    |       |       | AIC   |       |       | CIM   |       |       |
|----|---|---------|-------|-------|-------|-------|-------|-------|-------|-------|-------|
|    |   |         | Bet   | Wit   | Int   | Bet   | Wit   | Int   | Bet   | Wit   | Int   |
| 30 | = | ARH(1)  | 52.05 | 95.50 | 96.00 | 50.35 | 95.20 | 93.31 | 51.85 | 94.81 | 95.00 |
|    |   | RC      | 20.08 | 95.30 | 95.10 | 15.48 | 94.81 | 94.51 | 19.48 | 95.10 | 94.71 |
|    |   | UN      | 58.46 | 96.00 | 95.30 | 60.44 | 96.20 | 93.61 | 58.14 | 95.90 | 95.80 |
|    | + | ARH (1) | 46.25 | 96.20 | 94.11 | 50.55 | 96.00 | 94.91 | 46.15 | 95.50 | 95.30 |
|    |   | RC      | 13.79 | 95.70 | 96.00 | 11.99 | 95.00 | 93.41 | 13.69 | 95.30 | 95.00 |
|    |   | UN      | 50.75 | 95.80 | 94.91 | 59.04 | 96.00 | 93.31 | 50.25 | 93.41 | 93.41 |
|    | - | ARH (1) | 74.83 | 95.90 | 95.40 | 62.94 | 95.50 | 90.01 | 69.03 | 96.10 | 92.01 |
|    |   | RC      | 48.85 | 96.00 | 96.00 | 32.87 | 95.80 | 93.71 | 41.16 | 96.30 | 93.51 |
|    |   | UN      | 75.92 | 95.30 | 95.20 | 69.23 | 94.91 | 90.11 | 71.30 | 95.20 | 92.01 |
| 45 | = | ARH(1)  | 30.17 | 95.70 | 94.71 | 30.87 | 96.90 | 94.11 | 30.07 | 97.10 | 95.40 |
|    |   | RC      | 03.30 | 94.31 | 95.00 | 01.70 | 95.00 | 94.61 | 03.30 | 94.91 | 95.00 |
|    |   | UN      | 33.97 | 96.40 | 94.91 | 36.86 | 95.60 | 94.11 | 33.87 | 95.70 | 95.20 |
|    | + | ARH (1) | 24.18 | 94.11 | 95.20 | 23.88 | 95.10 | 94.51 | 24.18 | 94.81 | 94.71 |
|    |   | RC      | 02.30 | 95.50 | 94.61 | 01.20 | 94.61 | 94.51 | 02.20 | 94.91 | 95.20 |
|    |   | UN      | 27.28 | 93.91 | 95.10 | 32.97 | 94.91 | 95.80 | 28.27 | 94.21 | 95.40 |
|    | - | ARH (1) | 52.55 | 96.10 | 95.60 | 47.65 | 95.60 | 93.61 | 49.65 | 95.50 | 94.51 |
|    |   | RC      | 19.48 | 94.21 | 95.30 | 11.29 | 93.91 | 93.61 | 17.88 | 93.81 | 94.11 |
|    |   | UN      | 53.75 | 93.91 | 96.10 | 51.25 | 94.91 | 94.81 | 51.45 | 94.11 | 96.20 |
| 60 | = | ARH(1)  | 13.59 | 95.10 | 94.71 | 13.19 | 94.41 | 94.41 | 13.49 | 94.61 | 95.00 |
|    |   | RC      | 01.30 | 94.21 | 94.01 | 00.80 | 94.21 | 94.51 | 01.30 | 94.31 | 94.21 |
|    |   | UN      | 20.88 | 95.10 | 94.61 | 22.18 | 95.40 | 93.71 | 20.78 | 95.50 | 93.91 |
|    | + | ARH (1) | 32.07 | 95.30 | 95.40 | 29.97 | 95.20 | 95.50 | 31.97 | 95.10 | 95.90 |
|    |   | RC      | 00.60 | 95.30 | 95.80 | 00.30 | 94.21 | 95.20 | 00.60 | 94.21 | 95.50 |
|    |   | UN      | 17.48 | 96.00 | 94.91 | 19.88 | 94.21 | 95.10 | 17.58 | 94.21 | 95.30 |
|    | - | ARH (1) | 57.24 | 95.20 | 95.70 | 52.05 | 94.11 | 95.60 | 55.34 | 94.01 | 95.40 |
|    |   | RC      | 03.90 | 93.81 | 93.61 | 03.10 | 94.91 | 93.31 | 03.60 | 95.00 | 93.61 |
|    |   | UN      | 39.46 | 94.61 | 95.20 | 39.76 | 93.71 | 93.51 | 37.96 | 94.61 | 94.21 |

**Note:** Sample Size (N), Relationship between sample and dispersion matrix size (R), Null relation between sample and dispersion matrix size (=), Positive relation between sample and dispersion matrix size (+), Negative relation between sample and dispersion matrix size (-), Original Covariance Structure (OCS), Akaike's Information Criterion (AIC), Correctly Identified Model



Table 8: Percentages of Power when data are normally distributed  $(-1,1,0,0)$  and with trimmed 0.1 for covariance structures selecting

| N  | R | OCS    | BF    |       |       | AIC   |       |       | CIM   |       |       |
|----|---|--------|-------|-------|-------|-------|-------|-------|-------|-------|-------|
|    |   |        | Bet   | Wit   | Int   | Bet   | Wit   | Int   | Bet   | Wit   | Int   |
| 30 | = | ARH(1) | 53.45 | 95.50 | 96.00 | 51.35 | 95.50 | 94.11 | 52.85 | 95.30 | 94.81 |
|    |   | RC     | 16.78 | 94.11 | 94.81 | 12.39 | 93.41 | 94.11 | 16.18 | 93.21 | 95.40 |
|    |   | UN     | 61.14 | 94.81 | 96.10 | 60.34 | 94.21 | 94.31 | 59.94 | 94.91 | 95.60 |
|    | + | ARH(1) | 48.95 | 94.71 | 96.10 | 51.75 | 95.50 | 94.51 | 48.75 | 94.51 | 96.00 |
|    |   | RC     | 14.59 | 95.10 | 96.20 | 12.29 | 94.91 | 95.50 | 13.99 | 94.91 | 96.10 |
|    |   | UN     | 51.01 | 96.10 | 96.30 | 58.44 | 95.60 | 95.50 | 51.35 | 95.10 | 96.00 |
|    | - | ARH(1) | 74.03 | 94.41 | 96.80 | 64.94 | 94.61 | 93.41 | 69.44 | 94.51 | 93.81 |
|    |   | RC     | 48.85 | 94.11 | 95.70 | 29.67 | 94.11 | 91.51 | 41.06 | 94.51 | 92.41 |
|    |   | UN     | 77.92 | 95.10 | 96.50 | 68.93 | 94.51 | 91.51 | 72.63 | 94.01 | 92.61 |
| 45 | = | ARH(1) | 32.17 | 96.00 | 95.60 | 30.77 | 94.11 | 95.90 | 31.87 | 94.21 | 95.90 |
|    |   | RC     | 04.10 | 93.61 | 94.30 | 02.50 | 94.21 | 94.01 | 04.00 | 94.11 | 95.30 |
|    |   | UN     | 34.07 | 94.41 | 96.50 | 37.96 | 93.51 | 95.10 | 33.67 | 93.61 | 95.60 |
|    | + | ARH(1) | 25.27 | 95.50 | 95.30 | 25.47 | 95.50 | 95.00 | 25.17 | 95.70 | 95.10 |
|    |   | RC     | 02.60 | 94.31 | 95.80 | 02.00 | 94.31 | 94.41 | 02.70 | 94.21 | 94.61 |
|    |   | UN     | 28.27 | 95.50 | 95.60 | 35.46 | 94.21 | 94.91 | 28.17 | 94.11 | 95.80 |
|    | - | ARH(1) | 51.35 | 94.61 | 95.10 | 47.35 | 93.91 | 95.00 | 48.45 | 93.51 | 94.21 |
|    |   | RC     | 16.68 | 94.81 | 95.50 | 09.39 | 95.30 | 95.20 | 14.69 | 95.30 | 94.31 |
|    |   | UN     | 55.04 | 94.81 | 95.90 | 54.05 | 93.81 | 93.01 | 52.25 | 94.01 | 93.91 |
| 60 | = | ARH(1) | 15.69 | 96.50 | 94.51 | 14.29 | 95.70 | 94.31 | 15.48 | 96.20 | 95.30 |
|    |   | RC     | 00.40 | 95.00 | 95.20 | 00.40 | 95.20 | 94.51 | 00.40 | 95.40 | 94.01 |
|    |   | UN     | 18.48 | 94.71 | 95.70 | 20.28 | 95.10 | 94.51 | 18.28 | 95.50 | 95.10 |
|    | + | ARH(1) | 12.99 | 95.80 | 94.31 | 12.99 | 94.51 | 94.71 | 12.99 | 94.41 | 94.11 |
|    |   | RC     | 00.50 | 94.91 | 96.70 | 00.20 | 95.70 | 96.70 | 00.50 | 95.70 | 96.90 |
|    |   | UN     | 16.78 | 95.50 | 95.20 | 19.98 | 95.40 | 94.31 | 16.68 | 95.50 | 95.30 |
|    | - | ARH(1) | 33.77 | 95.70 | 95.20 | 32.67 | 96.00 | 94.21 | 32.17 | 96.40 | 94.21 |
|    |   | RC     | 04.40 | 95.60 | 94.11 | 02.90 | 95.70 | 93.11 | 03.50 | 95.90 | 94.21 |
|    |   | UN     | 37.96 | 94.51 | 95.10 | 35.66 | 93.21 | 93.51 | 36.16 | 93.71 | 94.31 |

**Note:** Sample Size (N), Relationship between sample and dispersion matrix size (R), Null relation between sample and dispersion matrix size (=), Positive relation between sample and dispersion matrix size (+), Negative relation between sample and dispersion matrix size (-), Original Covariance Structure (OCS), Akaike's Information Criterion (AIC), Correctly Identified Model

Table 9: Percentages of Power when data are normally distributed  $(-1,1,0,0)$  and with trimmed 0.2 for covariance structures selecting

| N  | R | OCS    | BF    |       |       | AIC   |       |       | CIM   |       |       |
|----|---|--------|-------|-------|-------|-------|-------|-------|-------|-------|-------|
|    |   |        | Bet   | Wit   | Int   | Bet   | Wit   | Int   | Bet   | Wit   | Int   |
| 30 | = | ARH(1) | 54.05 | 94.71 | 95.30 | 50.55 | 94.51 | 93.41 | 53.45 | 94.61 | 94.81 |
|    |   | RC     | 18.98 | 96.00 | 94.51 | 14.69 | 95.40 | 92.91 | 18.19 | 95.90 | 94.51 |
|    |   | UN     | 58.44 | 95.90 | 96.20 | 60.24 | 95.30 | 94.41 | 57.44 | 95.30 | 96.40 |
|    | + | ARH(1) | 48.35 | 94.81 | 95.60 | 52.15 | 95.00 | 94.91 | 48.05 | 94.31 | 95.80 |
|    |   | RC     | 12.39 | 95.60 | 96.10 | 11.49 | 95.30 | 94.81 | 12.39 | 95.60 | 95.90 |
|    |   | UN     | 51.95 | 95.10 | 95.60 | 59.84 | 95.20 | 94.51 | 51.45 | 94.71 | 95.50 |
|    | - | ARH(1) | 73.73 | 95.30 | 95.60 | 64.74 | 94.11 | 92.01 | 69.63 | 94.61 | 93.51 |
|    |   | RC     | 46.55 | 94.11 | 96.60 | 27.27 | 93.31 | 92.51 | 37.96 | 94.21 | 93.81 |
|    |   | UN     | 77.72 | 96.10 | 97.20 | 70.93 | 95.80 | 92.51 | 71.83 | 96.60 | 94.81 |
| 45 | = | ARH(1) | 33.57 | 94.61 | 95.10 | 31.67 | 95.00 | 95.00 | 33.07 | 95.10 | 94.91 |
|    |   | RC     | 04.00 | 94.41 | 95.80 | 02.90 | 94.31 | 94.91 | 04.00 | 94.31 | 95.50 |
|    |   | UN     | 35.46 | 94.31 | 95.50 | 37.76 | 92.61 | 93.71 | 35.26 | 93.21 | 95.40 |
|    | + | ARH(1) | 24.98 | 96.00 | 95.50 | 24.48 | 96.40 | 95.40 | 24.98 | 95.90 | 95.40 |
|    |   | RC     | 01.90 | 95.60 | 94.71 | 01.60 | 95.60 | 92.91 | 01.90 | 95.40 | 93.01 |
|    |   | UN     | 28.97 | 96.30 | 94.31 | 32.97 | 95.60 | 94.61 | 28.87 | 95.40 | 95.10 |
|    | - | ARH(1) | 54.95 | 95.90 | 95.30 | 49.85 | 95.00 | 93.61 | 52.45 | 94.71 | 92.91 |
|    |   | RC     | 17.28 | 95.30 | 95.20 | 10.89 | 93.71 | 94.01 | 15.98 | 93.71 | 94.21 |
|    |   | UN     | 59.04 | 94.31 | 95.60 | 56.84 | 94.21 | 93.11 | 56.24 | 94.31 | 94.91 |
| 60 | = | ARH(1) | 15.88 | 95.30 | 95.70 | 15.68 | 95.40 | 95.40 | 15.88 | 95.50 | 95.30 |
|    |   | RC     | 00.30 | 95.80 | 96.30 | 00.50 | 95.50 | 95.10 | 00.30 | 95.60 | 94.91 |
|    |   | UN     | 17.58 | 93.81 | 95.70 | 20.28 | 93.61 | 94.01 | 17.68 | 94.01 | 95.50 |
|    | + | ARH(1) | 10.59 | 96.30 | 95.30 | 10.69 | 95.80 | 95.40 | 10.59 | 95.80 | 95.80 |
|    |   | RC     | 00.40 | 96.00 | 95.90 | 00.40 | 95.50 | 95.70 | 00.40 | 95.60 | 95.90 |
|    |   | UN     | 14.99 | 96.20 | 94.71 | 19.38 | 95.10 | 95.50 | 14.99 | 95.40 | 95.40 |
|    | - | ARH(1) | 32.97 | 95.60 | 95.10 | 32.57 | 95.10 | 95.20 | 31.97 | 94.91 | 94.91 |
|    |   | RC     | 05.79 | 94.71 | 95.30 | 03.00 | 94.81 | 96.10 | 05.69 | 94.61 | 95.00 |
|    |   | UN     | 42.26 | 95.00 | 95.20 | 43.06 | 94.51 | 94.21 | 41.26 | 94.51 | 94.81 |

**Note:** Sample Size (N), Relationship between sample and dispersion matrix size (R), Null relation between sample and dispersion matrix size (=), Positive relation between sample and dispersion matrix size (+), Negative relation between sample and dispersion matrix size (-), Original Covariance Structure (OCS), Akaike's Information Criterion (AIC), Correctly Identified Model

Table 10: Percentages of Power when data are not normally distributed (Slight Skewness  $-1,1,0,0;-1,0,1,0;-1,0,0,1$ ) and without trimmed for covariance structures selecting

| N  | R | OCS     | BF    |       |       | AIC   |       |       | CIM   |       |       |
|----|---|---------|-------|-------|-------|-------|-------|-------|-------|-------|-------|
|    |   |         | Bet   | Wit   | Int   | Bet   | Wit   | Int   | Bet   | Wit   | Int   |
| 30 | = | ARH(1)  | 40.06 | 94.91 | 95.60 | 37.46 | 95.20 | 94.51 | 39.56 | 94.71 | 96.00 |
|    |   | RC      | 12.99 | 95.00 | 96.30 | 10.49 | 93.11 | 93.21 | 11.79 | 92.71 | 94.61 |
|    |   | UN      | 60.94 | 96.60 | 97.90 | 60.44 | 93.81 | 97.20 | 59.34 | 94.21 | 97.70 |
|    | + | ARH (1) | 32.27 | 96.60 | 92.27 | 35.56 | 95.10 | 93.71 | 31.10 | 95.10 | 95.30 |
|    |   | RC      | 08.49 | 96.40 | 96.70 | 07.19 | 95.30 | 95.50 | 08.19 | 96.00 | 96.60 |
|    |   | UN      | 58.34 | 96.30 | 97.50 | 56.94 | 95.40 | 98.00 | 57.04 | 96.00 | 97.60 |
|    | - | ARH (1) | 65.43 | 93.11 | 96.70 | 52.85 | 91.41 | 93.41 | 56.44 | 91.61 | 93.41 |
|    |   | RC      | 38.66 | 93.91 | 96.80 | 23.78 | 89.61 | 91.21 | 27.87 | 89.91 | 91.31 |
|    |   | UN      | 72.63 | 96.00 | 98.60 | 65.53 | 93.71 | 96.60 | 65.63 | 93.31 | 96.60 |
| 45 | = | ARH(1)  | 17.48 | 96.60 | 95.60 | 15.58 | 95.40 | 96.00 | 16.98 | 95.50 | 95.20 |
|    |   | RC      | 02.00 | 95.90 | 96.50 | 01.70 | 93.21 | 94.01 | 02.10 | 93.21 | 93.71 |
|    |   | UN      | 47.05 | 95.20 | 97.40 | 47.25 | 94.11 | 97.40 | 45.95 | 94.01 | 97.70 |
|    | + | ARH (1) | 09.89 | 94.81 | 95.60 | 10.69 | 94.91 | 95.60 | 09.99 | 95.00 | 95.50 |
|    |   | RC      | 00.70 | 95.70 | 95.80 | 00.70 | 96.20 | 95.80 | 00.70 | 96.00 | 96.60 |
|    |   | UN      | 41.66 | 96.10 | 97.20 | 42.36 | 95.10 | 97.30 | 41.16 | 95.00 | 97.30 |
|    | - | ARH (1) | 38.96 | 94.01 | 97.10 | 32.37 | 92.91 | 95.80 | 35.06 | 93.21 | 95.80 |
|    |   | RC      | 09.79 | 94.31 | 96.60 | 06.79 | 89.91 | 91.71 | 07.89 | 90.11 | 91.41 |
|    |   | UN      | 55.14 | 95.30 | 97.70 | 51.85 | 91.98 | 97.10 | 51.55 | 91.81 | 97.10 |
| 60 | = | ARH(1)  | 04.70 | 93.21 | 94.91 | 04.10 | 94.41 | 94.71 | 04.50 | 94.21 | 94.81 |
|    |   | RC      | 00.10 | 95.00 | 96.40 | 00.10 | 93.31 | 93.61 | 00.10 | 93.41 | 94.61 |
|    |   | UN      | 36.76 | 95.20 | 95.90 | 36.66 | 93.31 | 95.60 | 36.16 | 93.51 | 95.90 |
|    | + | ARH (1) | 03.60 | 94.61 | 95.20 | 03.60 | 93.51 | 95.50 | 03.60 | 93.81 | 95.10 |
|    |   | RC      | 00.00 | 96.30 | 95.70 | 00.00 | 94.61 | 95.30 | 00.00 | 94.91 | 95.60 |
|    |   | UN      | 29.17 | 95.40 | 96.40 | 29.07 | 95.10 | 97.10 | 28.67 | 95.40 | 97.20 |
|    | - | ARH (1) | 17.68 | 94.11 | 94.11 | 14.89 | 92.91 | 95.20 | 16.88 | 92.61 | 94.71 |
|    |   | RC      | 02.60 | 93.21 | 95.10 | 02.40 | 89.81 | 92.31 | 02.30 | 90.01 | 91.41 |
|    |   | UN      | **    |       |       |       |       |       |       |       |       |

**Note:** Sample Size (N), Relationship between sample and dispersion matrix size (R), Null relation between sample and dispersion matrix size (=), Positive relation between sample and dispersion matrix size (+), Negative relation between sample and dispersion matrix size (-), Original Covariance Structure (OCS), Akaike's Information Criterion (AIC), Correctly Identified Model (MCI), Type I error rates exceeding Bradley's liberal criterion (Boldface).

Table 11: Percentages of Power when data are not normally distributed (Moderate Skewness -1,1,0,0;-1,0,1,0;-1,0,0,1) and without trimmed for covariance structures selecting

| N  | R | OCS     | BF    |       |       | AIC   |       |       | CIM   |       |       |
|----|---|---------|-------|-------|-------|-------|-------|-------|-------|-------|-------|
|    |   |         | Bet   | Wit   | Int   | Bet   | Wit   | Int   | Bet   | Wit   | Int   |
| 30 | = | ARH(1)  | 37.46 | 94.51 | 97.30 | 35.36 | 91.31 | 96.90 | 36.16 | 91.01 | 96.80 |
|    |   | RC      | 10.09 | 95.60 | 97.90 | 07.99 | 93.31 | 96.30 | 08.49 | 93.61 | 97.40 |
|    |   | UN      | 73.43 | 94.41 | 96.20 | 70.63 | 94.01 | 94.61 | 72.23 | 94.11 | 96.20 |
|    | + | ARH (1) | 32.47 | 96.00 | 96.10 | 32.77 | 94.81 | 97.40 | 31.87 | 95.00 | 98.30 |
|    |   | RC      | 07.29 | 96.60 | 98.00 | 05.60 | 95.00 | 97.00 | 06.29 | 95.20 | 97.70 |
|    |   | UN      | 68.13 | 96.40 | 96.20 | 70.53 | 96.60 | 93.71 | 68.33 | 95.80 | 96.30 |
|    | - | ARH (1) | 66.33 | 94.51 | 98.00 | 55.24 | 90.81 | 95.40 | 57.04 | 90.81 | 96.60 |
|    |   | RC      | 26.47 | 94.71 | 97.60 | 14.19 | 90.31 | 93.61 | 16.28 | 91.11 | 93.81 |
|    |   | UN      | 87.81 | 94.21 | 97.00 | 78.02 | 92.71 | 91.91 | 81.32 | 92.41 | 95.10 |
| 45 | = | ARH(1)  | 15.48 | 94.61 | 96.00 | 13.69 | 92.51 | 96.30 | 15.18 | 92.31 | 96.30 |
|    |   | RC      | 02.30 | 94.51 | 97.30 | 02.00 | 91.41 | 95.90 | 02.30 | 92.11 | 96.30 |
|    |   | UN      | 52.85 | 95.30 | 95.30 | 56.24 | 94.91 | 95.50 | 52.65 | 95.10 | 95.80 |
|    | + | ARH (1) | 09.89 | 95.90 | 96.40 | 10.49 | 95.10 | 95.60 | 09.89 | 95.00 | 96.70 |
|    |   | RC      | 01.40 | 96.10 | 97.50 | 01.00 | 95.40 | 96.20 | 01.00 | 95.80 | 96.80 |
|    |   | UN      | 50.45 | 95.10 | 95.30 | 53.85 | 94.01 | 94.41 | 50.65 | 94.21 | 95.70 |
|    | - | ARH (1) | 33.67 | 93.31 | 96.10 | 27.97 | 91.51 | 94.91 | 30.17 | 91.11 | 94.51 |
|    |   | RC      | 09.39 | 94.31 | 97.70 | 07.09 | 90.91 | 93.71 | 07.29 | 91.21 | 93.81 |
|    |   | UN      | 71.23 | 94.41 | 96.00 | 68.33 | 92.31 | 94.11 | 67.73 | 92.01 | 94.91 |
| 60 | = | ARH(1)  | 05.49 | 96.50 | 96.00 | 04.30 | 94.11 | 95.90 | 05.29 | 94.11 | 95.80 |
|    |   | RC      | 00.40 | 95.60 | 96.60 | 00.30 | 94.31 | 94.91 | 00.40 | 94.71 | 95.00 |
|    |   | UN      | 42.26 | 95.50 | 95.60 | 43.06 | 94.51 | 94.81 | 42.06 | 94.51 | 95.60 |
|    | + | ARH (1) | 02.20 | 95.00 | 96.10 | 01.80 | 93.61 | 96.40 | 02.10 | 93.21 | 95.90 |
|    |   | RC      | 00.30 | 96.30 | 97.80 | 00.30 | 95.50 | 96.50 | 00.30 | 95.60 | 96.80 |
|    |   | UN      | 32.97 | 94.91 | 95.50 | 36.16 | 94.81 | 95.30 | 33.07 | 94.71 | 95.90 |
|    | - | ARH (1) | 14.79 | 94.01 | 97.00 | 13.39 | 92.61 | 95.70 | 13.29 | 91.81 | 94.81 |
|    |   | RC      | 03.80 | 95.00 | 96.70 | 02.90 | 92.91 | 94.31 | 03.20 | 92.81 | 94.31 |
|    |   | UN      | 58.74 | 95.30 | 96.50 | 61.94 | 94.01 | 95.00 | 56.94 | 94.21 | 96.40 |

**Note:** Sample Size (N), Relationship between sample and dispersion matrix size (R), Null relation between sample and dispersion matrix size (=), Positive relation between sample and dispersion matrix size (+), Negative relation between sample and dispersion matrix size (-), Original Covariance Structure (OCS), Akaike's Information Criterion (AIC), Correctly Identified Model (MCI), Type I error rates exceeding Bradley's liberal criterion (Boldface).

Table 12: Percentages of Power when data are not normally distributed (Strong Skewness  $-1,1,0,0;-1,0,1,0;-1,0,0,1$ ) and without trimmed for covariance structures selecting

| N  | R | OCS     | BF    |       |       | AIC   |       |       | CIM   |       |       |
|----|---|---------|-------|-------|-------|-------|-------|-------|-------|-------|-------|
|    |   |         | Bet   | Wit   | Int   | Bet   | Wit   | Int   | Bet   | Wit   | Int   |
| 30 | = | ARH(1)  | 28.77 | 96.70 | 97.70 | 26.37 | 94.11 | 97.10 | 26.07 | 94.21 | 97.80 |
|    |   | RC      | 14.19 | 95.00 | 96.10 | 11.49 | 93.41 | 94.41 | 13.79 | 93.41 | 95.20 |
|    |   | UN      | 69.83 | 94.81 | 97.20 | 68.63 | 93.41 | 96.00 | 68.93 | 92.81 | 97.10 |
|    | + | ARH (1) | 25.37 | 97.60 | 98.20 | 22.48 | 96.80 | 98.00 | 23.38 | 97.00 | 97.60 |
|    |   | RC      | 10.09 | 96.10 | 97.40 | 10.69 | 94.91 | 96.00 | 09.49 | 94.71 | 96.90 |
|    |   | UN      | 65.93 | 96.00 | 96.90 | 67.33 | 94.71 | 96.50 | 65.43 | 94.61 | 97.60 |
|    | - | ARH (1) | 47.45 | 95.00 | 98.40 | 35.56 | 91.61 | 96.30 | 36.66 | 91.31 | 96.40 |
|    |   | RC      | 43.16 | 95.70 | 96.40 | 27.67 | 94.11 | 91.11 | 34.17 | 94.01 | 92.01 |
|    |   | UN      | 82.42 | 94.41 | 98.60 | 76.42 | 89.11 | 94.01 | 77.12 | 88.61 | 95.50 |
| 45 | = | ARH(1)  | 10.19 | 96.10 | 96.90 | 09.19 | 94.31 | 97.10 | 09.49 | 94.91 | 96.80 |
|    |   | RC      | 01.70 | 96.10 | 96.10 | 01.50 | 95.30 | 93.81 | 01.70 | 95.40 | 94.31 |
|    |   | UN      | 54.15 | 94.51 | 95.60 | 56.04 | 93.21 | 94.41 | 53.75 | 92.71 | 95.10 |
|    | + | ARH (1) | 07.99 | 95.70 | 96.70 | 07.99 | 95.30 | 96.50 | 07.69 | 95.20 | 97.20 |
|    |   | RC      | 01.00 | 95.90 | 96.20 | 01.10 | 96.00 | 95.90 | 00.90 | 95.80 | 95.50 |
|    |   | UN      | 48.95 | 94.91 | 96.40 | 50.75 | 94.11 | 95.50 | 48.35 | 94.01 | 96.10 |
|    | - | ARH (1) | 22.48 | 96.50 | 98.30 | 18.88 | 92.21 | 96.80 | 18.58 | 92.31 | 97.00 |
|    |   | RC      | 12.19 | 95.10 | 95.20 | 08.49 | 93.41 | 93.31 | 10.79 | 93.41 | 92.71 |
|    |   | UN      | 67.53 | 95.00 | 96.60 | 64.74 | 91.71 | 93.91 | 64.04 | 91.71 | 94.91 |
| 60 | = | ARH(1)  | 04.90 | 96.60 | 97.10 | 04.30 | 94.31 | 97.10 | 04.30 | 94.31 | 96.90 |
|    |   | RC      | 00.10 | 94.41 | 95.60 | 00.00 | 93.61 | 94.31 | 00.10 | 93.81 | 94.41 |
|    |   | UN      | 39.76 | 94.51 | 95.90 | 41.86 | 93.11 | 94.71 | 39.56 | 93.01 | 95.30 |
|    | + | ARH (1) | 03.20 | 95.40 | 95.50 | 03.00 | 95.30 | 96.70 | 03.20 | 95.10 | 96.10 |
|    |   | RC      | 00.20 | 95.80 | 95.00 | 00.20 | 95.30 | 95.10 | 00.20 | 95.10 | 96.20 |
|    |   | UN      | 34.57 | 95.00 | 95.80 | 36.56 | 94.71 | 94.21 | 34.77 | 94.61 | 94.91 |
|    | - | ARH (1) | 12.69 | 95.20 | 97.50 | 11.29 | 92.71 | 96.40 | 11.59 | 93.01 | 96.10 |
|    |   | RC      | 03.00 | 94.21 | 94.41 | 00.80 | 93.21 | 92.61 | 02.30 | 93.11 | 92.21 |
|    |   | UN      | 53.61 | 94.01 | 96.70 | 51.15 | 92.41 | 94.91 | 50.75 | 91.91 | 95.40 |

**Note:** Sample Size (N), Relationship between sample and dispersion matrix size (R), Null relation between sample and dispersion matrix size (=), Positive relation between sample and dispersion matrix size (+), Negative relation between sample and dispersion matrix size (-), Original Covariance Structure (OCS), Akaike's Information Criterion (AIC), Correctly Identified Model (MCI), Type I error rates exceeding Bradley's liberal criterion (Boldface).



Table 13: Percentages of Power when data are not normally distributed (Slight Skewness-1,0,1,0) and trimmed 0.1 for covariance structures selecting

| N  | R | OCS    | BF    |       |       | AIC   |       |       | CIM   |       |       |
|----|---|--------|-------|-------|-------|-------|-------|-------|-------|-------|-------|
|    |   |        | Bet   | Wit   | Int   | Bet   | Wit   | Int   | Bet   | Wit   | Int   |
| 30 | = | ARH(1) | 56.84 | 94.31 | 95.90 | 52.05 | 94.31 | 94.81 | 55.84 | 93.91 | 96.30 |
|    |   | RC     | 32.57 | 94.11 | 98.00 | 11.09 | 93.01 | 94.41 | 13.99 | 93.11 | 96.10 |
|    |   | UN     | 69.33 | 95.00 | 97.90 | 58.64 | 94.71 | 95.20 | 54.75 | 94.11 | 96.80 |
|    | + | ARH(1) | 52.75 | 96.70 | 94.40 | 51.65 | 95.50 | 94.81 | 52.45 | 95.60 | 95.90 |
|    |   | RC     | 18.18 | 95.80 | 97.70 | 08.69 | 94.01 | 94.71 | 08.09 | 94.01 | 95.70 |
|    |   | UN     | 62.84 | 95.60 | 97.70 | 58.74 | 94.91 | 95.60 | 50.15 | 94.51 | 96.90 |
|    | - | ARH(1) | 77.72 | 93.81 | 98.10 | 66.83 | 92.11 | 94.11 | 71.53 | 92.21 | 94.91 |
|    |   | RC     | 50.45 | 93.81 | 97.30 | 27.27 | 91.71 | 92.41 | 37.36 | 91.91 | 91.31 |
|    |   | UN     | 78.46 | 94.01 | 98.40 | 66.53 | 92.61 | 93.51 | 68.73 | 91.81 | 95.40 |
| 45 | = | ARH(1) | 34.87 | 94.91 | 95.60 | 31.57 | 94.71 | 94.91 | 34.57 | 94.81 | 95.60 |
|    |   | RC     | 04.50 | 96.00 | 97.40 | 01.70 | 94.81 | 95.70 | 02.00 | 94.91 | 95.20 |
|    |   | UN     | 38.06 | 96.40 | 97.30 | 37.06 | 93.41 | 94.71 | 29.07 | 93.51 | 95.90 |
|    | + | ARH(1) | 31.17 | 96.10 | 95.70 | 30.17 | 97.10 | 95.10 | 30.97 | 96.40 | 94.91 |
|    |   | RC     | 00.20 | 96.00 | 96.70 | 00.60 | 95.60 | 94.11 | 00.40 | 95.30 | 95.40 |
|    |   | UN     | 34.67 | 96.00 | 96.30 | 34.07 | 95.80 | 94.71 | 26.17 | 95.40 | 95.40 |
|    | - | ARH(1) | 56.04 | 95.10 | 96.60 | 48.65 | 93.61 | 93.61 | 52.15 | 94.21 | 94.31 |
|    |   | RC     | 15.68 | 95.50 | 95.60 | 07.89 | 93.81 | 92.81 | 12.09 | 93.81 | 92.61 |
|    |   | UN     | 53.15 | 94.61 | 96.90 | 54.75 | 93.71 | 95.20 | 47.95 | 93.41 | 95.90 |
| 60 | = | ARH(1) | 18.98 | 94.81 | 95.80 | 16.68 | 94.61 | 94.61 | 18.88 | 94.61 | 95.00 |
|    |   | RC     | 01.10 | 95.90 | 97.20 | 00.20 | 95.10 | 95.30 | 00.30 | 95.10 | 95.30 |
|    |   | UN     | 26.97 | 94.71 | 97.50 | 22.48 | 93.81 | 95.80 | 16.08 | 94.11 | 96.20 |
|    | + | ARH(1) | 15.28 | 95.20 | 95.90 | 13.99 | 94.91 | 96.20 | 15.48 | 94.81 | 96.50 |
|    |   | RC     | 00.50 | 95.10 | 96.20 | 00.20 | 94.01 | 94.51 | 00.20 | 93.91 | 94.41 |
|    |   | UN     | 17.72 | 95.80 | 96.80 | 17.52 | 94.89 | 95.30 | 11.61 | 94.79 | 96.20 |
|    | - | ARH(1) | 40.46 | 95.40 | 95.90 | 37.16 | 95.00 | 95.00 | 38.76 | 94.51 | 94.61 |
|    |   | RC     | 08.39 | 94.21 | 96.80 | 01.90 | 93.41 | 92.91 | 02.30 | 93.61 | 93.01 |
|    |   | UN     | 45.35 | 94.51 | 96.00 | 36.56 | 93.41 | 93.11 | 31.87 | 93.81 | 93.61 |

**Note:** Sample Size (N), Relationship between sample and dispersion matrix size (R), Null relation between sample and dispersion matrix size (=), Positive relation between sample and dispersion matrix size (+), Negative relation between sample and dispersion matrix size (-), Original Covariance Structure (OCS), Akaike's Information Criterion (AIC), Correctly Identified Model (MCI), Type I error rates exceeding Bradley's liberal criterion (Boldface).

Table 14: Percentages of Power when data are not normally distributed (Moderate Skewness-1,0,1,0) and trimmed 0.1 for covariance structures selecting

| N  | R | OCS     | BF    |       |       | AIC   |       |       | CIM   |       |       |
|----|---|---------|-------|-------|-------|-------|-------|-------|-------|-------|-------|
|    |   |         | Bet   | Wit   | Int   | Bet   | Wit   | Int   | Bet   | Wit   | Int   |
| 30 | = | ARH(1)  | 56.54 | 96.91 | 97.10 | 53.05 | 92.01 | 96.90 | 54.95 | 92.11 | 96.60 |
|    |   | RC      | 51.65 | 92.21 | 98.30 | 10.39 | 92.61 | 93.31 | 11.79 | 92.61 | 94.21 |
|    |   | UN      | 68.53 | 96.20 | 98.30 | 57.34 | 94.41 | 95.70 | 54.25 | 94.01 | 97.00 |
|    | + | ARH (1) | 50.95 | 96.70 | 96.40 | 48.55 | 96.70 | 95.80 | 49.45 | 96.30 | 97.30 |
|    |   | RC      | 15.38 | 95.80 | 98.00 | 07.29 | 94.71 | 95.10 | 08.89 | 95.20 | 96.80 |
|    |   | UN      | 52.65 | 94.11 | 98.40 | 49.45 | 94.01 | 96.40 | 45.25 | 94.61 | 98.30 |
|    | - | ARH (1) | 74.83 | 94.41 | 98.70 | 65.23 | 89.91 | 95.30 | 67.63 | 89.61 | 96.30 |
|    |   | RC      | 42.66 | 94.41 | 97.30 | 24.28 | 89.31 | 90.21 | 27.67 | 88.91 | 90.91 |
|    |   | UN      | 76.72 | 94.71 | 99.00 | 64.74 | 90.41 | 95.30 | 65.53 | 89.01 | 96.20 |
| 45 | = | ARH(1)  | 34.67 | 95.10 | 96.60 | 32.47 | 93.61 | 95.40 | 34.17 | 93.31 | 95.10 |
|    |   | RC      | 03.00 | 92.71 | 94.60 | 01.50 | 91.50 | 93.81 | 01.20 | 92.11 | 95.00 |
|    |   | UN      | 30.97 | 95.20 | 97.30 | 29.77 | 93.61 | 94.91 | 26.27 | 93.31 | 94.81 |
|    | + | ARH (1) | 69.33 | 96.10 | 95.80 | 29.07 | 94.41 | 96.70 | 30.57 | 94.61 | 97.00 |
|    |   | RC      | 01.30 | 94.51 | 96.60 | 00.40 | 94.31 | 95.50 | 00.50 | 94.41 | 96.20 |
|    |   | UN      | 26.07 | 93.41 | 97.00 | 27.87 | 95.10 | 97.10 | 22.78 | 95.20 | 97.00 |
|    | - | ARH (1) | 52.35 | 93.81 | 96.70 | 46.75 | 91.31 | 95.20 | 50.05 | 91.31 | 95.30 |
|    |   | RC      | 14.19 | 95.80 | 96.80 | 08.79 | 91.71 | 91.61 | 10.59 | 91.21 | 91.61 |
|    |   | UN      | 49.65 | 95.70 | 97.80 | 49.15 | 92.21 | 94.81 | 43.86 | 92.21 | 95.50 |
| 60 | = | ARH(1)  | 20.68 | 95.10 | 95.90 | 17.68 | 93.81 | 95.90 | 20.08 | 93.91 | 95.40 |
|    |   | RC      | 00.20 | 93.51 | 96.20 | 00.20 | 92.61 | 93.71 | 00.10 | 92.81 | 94.01 |
|    |   | UN      | 17.28 | 93.81 | 97.00 | 17.58 | 93.91 | 95.90 | 14.79 | 93.81 | 96.40 |
|    | + | ARH (1) | 15.08 | 96.10 | 96.50 | 14.69 | 95.10 | 96.50 | 15.08 | 95.20 | 96.70 |
|    |   | RC      | 00.20 | 95.10 | 96.10 | 00.10 | 94.61 | 94.51 | 00.10 | 94.61 | 94.71 |
|    |   | UN      | 12.49 | 96.20 | 97.20 | 12.49 | 94.61 | 96.30 | 09.29 | 94.51 | 96.40 |
|    | - | ARH (1) | 36.86 | 94.31 | 96.00 | 33.57 | 91.31 | 95.40 | 35.66 | 91.61 | 95.40 |
|    |   | RC      | 04.60 | 91.31 | 94.11 | 01.60 | 89.61 | 90.71 | 01.90 | 90.21 | 90.41 |
|    |   | UN      | 40.66 | 92.41 | 97.40 | 32.17 | 90.01 | 95.00 | 29.47 | 89.91 | 95.40 |

**Note:** Sample Size (N), Relationship between sample and dispersion matrix size (R), Null relation between sample and dispersion matrix size (=), Positive relation between sample and dispersion matrix size (+), Negative relation between sample and dispersion matrix size (-), Original Covariance Structure (OCS), Akaike's Information Criterion (AIC), Correctly Identified Model (MCI), Type I error rates exceeding Bradley's liberal criterion (Boldface).



Table 15: Percentages of Power when data are not normally distributed (Strong Skewness-1,0,1,0) and trimmed 0.1 for covariance structures selecting

| N  | R | OCS     | BF     |       |       | AIC   |       |       | CIM   |       |       |
|----|---|---------|--------|-------|-------|-------|-------|-------|-------|-------|-------|
|    |   |         | Bet    | Wit   | Int   | Bet   | Wit   | Int   | Bet   | Wit   | Int   |
| 30 | = | ARH(1)  | 46.75  | 95.90 | 98.10 | 43.86 | 93.41 | 97.40 | 44.26 | 94.01 | 97.60 |
|    |   | RC      | 27.17  | 95.00 | 97.70 | 12.69 | 93.11 | 94.11 | 14.29 | 93.61 | 95.00 |
|    |   | UN      | 28.873 | 93.71 | 98.40 | 42.36 | 95.20 | 97.00 | 39.46 | 94.31 | 97.70 |
|    | + | ARH (1) | 41.46  | 97.70 | 97.90 | 37.56 | 97.00 | 98.00 | 38.26 | 97.10 | 97.90 |
|    |   | RC      | 04.70  | 95.10 | 97.80 | 06.39 | 95.40 | 96.20 | 06.59 | 95.60 | 97.20 |
|    |   | UN      | 28.17  | 93.41 | 97.40 | 37.86 | 96.50 | 97.50 | 36.16 | 96.00 | 97.90 |
|    | - | ARH (1) | 63.74  | 95.10 | 98.60 | 53.65 | 91.91 | 96.80 | 54.25 | 92.61 | 97.40 |
|    |   | RC      | 25.37  | 94.21 | 98.60 | 15.68 | 91.81 | 94.01 | 17.58 | 92.01 | 94.41 |
|    |   | UN      | 60.84  | 94.11 | 98.70 | 52.25 | 92.11 | 96.80 | 51.85 | 92.91 | 96.60 |
| 45 | = | ARH(1)  | 26.27  | 95.80 | 97.60 | 23.58 | 93.51 | 97.00 | 24.98 | 93.71 | 97.40 |
|    |   | RC      | 00.20  | 92.31 | 95.50 | 01.40 | 92.61 | 95.80 | 01.50 | 92.71 | 96.60 |
|    |   | UN      | 11.89  | 92.51 | 96.70 | 23.08 | 94.01 | 96.20 | 21.98 | 94.21 | 97.00 |
|    | + | ARH (1) | 20.68  | 97.30 | 97.70 | 19.78 | 96.60 | 97.00 | 20.08 | 96.80 | 97.60 |
|    |   | RC      | 00.40  | 94.21 | 96.50 | 01.20 | 96.20 | 97.00 | 01.30 | 96.10 | 97.50 |
|    |   | UN      | 08.69  | 91.51 | 94.91 | 19.18 | 95.50 | 97.30 | 17.68 | 95.40 | 97.70 |
|    | - | ARH (1) | 38.96  | 93.61 | 97.70 | 33.07 | 91.31 | 97.10 | 34.47 | 91.41 | 96.60 |
|    |   | RC      | 07.39  | 94.11 | 96.30 | 05.39 | 91.21 | 92.91 | 06.09 | 91.31 | 93.81 |
|    |   | UN      | 32.27  | 94.71 | 97.30 | 32.97 | 92.51 | 96.20 | 30.47 | 92.81 | 96.70 |
| 60 | = | ARH(1)  | 12.79  | 95.80 | 96.40 | 12.19 | 94.71 | 95.70 | 12.39 | 94.81 | 95.80 |
|    |   | RC      | 00.00  | 89.01 | 92.61 | 00.40 | 92.91 | 96.50 | 00.40 | 93.31 | 96.70 |
|    |   | UN      | 02.40  | 90.61 | 93.41 | 13.99 | 94.41 | 96.60 | 12.79 | 94.61 | 96.90 |
|    | + | ARH (1) | 40.46  | 95.40 | 95.90 | 37.16 | 95.00 | 95.00 | 38.76 | 94.51 | 94.61 |
|    |   | RC      | 00.00  | 92.91 | 94.61 | 00.10 | 95.20 | 95.30 | 00.10 | 94.91 | 95.30 |
|    |   | UN      | 02.00  | 94.61 | 94.11 | 10.69 | 97.10 | 97.00 | 10.09 | 97.10 | 96.90 |
|    | - | ARH (1) | 26.77  | 95.90 | 97.10 | 23.38 | 90.81 | 96.20 | 24.08 | 90.91 | 96.30 |
|    |   | RC      | 01.00  | 90.41 | 94.61 | 02.00 | 91.71 | 94.71 | 02.40 | 91.91 | 95.20 |
|    |   | UN      | 11.49  | 89.11 | 96.20 | 20.38 | 91.01 | 98.10 | 18.98 | 91.21 | 97.90 |

**Note:** Sample Size (N), Relationship between sample and dispersion matrix size (R), Null relation between sample and dispersion matrix size (=), Positive relation between sample and dispersion matrix size (+), Negative relation between sample and dispersion matrix size (-), Original Covariance Structure (OCS), Akaike's Information Criterion (AIC), Correctly Identified Model (MCI), Type I error rates exceeding Bradley's liberal criterion (Boldface).

Table 16: Percentages of Power when data are not normally distributed (Slight Bias-1,0,1,0) and trimmed 0.2 for covariance structures selecting

| N  | R | OCS    | BF    |       |       | AIC   |       |       | CIM   |       |       |
|----|---|--------|-------|-------|-------|-------|-------|-------|-------|-------|-------|
|    |   |        | Bet   | Wit   | Int   | Bet   | Wit   | Int   | Bet   | Wit   | Int   |
| 30 | = | ARH(1) | 91.81 | 94.61 | 98.90 | 69.73 | 94.71 | 94.51 | 70.33 | 94.61 | 95.80 |
|    |   | RC     | 86.11 | 95.30 | 98.80 | 41.16 | 94.71 | 94.41 | 49.65 | 94.21 | 95.60 |
|    |   | UN     | 92.31 | 95.20 | 99.40 | 70.93 | 95.00 | 94.41 | 71.23 | 95.30 | 95.80 |
|    | + | ARH(1) | 86.81 | 96.50 | 98.70 | 65.03 | 96.10 | 94.91 | 65.03 | 96.00 | 95.80 |
|    |   | RC     | 42.46 | 95.90 | 98.50 | 08.59 | 94.91 | 94.61 | 09.69 | 95.30 | 96.20 |
|    |   | UN     | 86.31 | 95.80 | 99.30 | 70.43 | 95.40 | 95.10 | 67.43 | 94.61 | 96.80 |
|    | - | ARH(1) | 97.60 | 93.91 | 99.30 | 77.52 | 92.31 | 93.41 | 80.72 | 92.11 | 94.71 |
|    |   | RC     | 85.21 | 93.81 | 99.20 | 26.97 | 92.31 | 92.91 | 38.86 | 92.51 | 92.41 |
|    |   | UN     | 96.20 | 93.91 | 98.70 | 77.52 | 91.51 | 93.41 | 78.92 | 91.31 | 94.51 |
| 45 | = | ARH(1) | 79.12 | 94.01 | 98.00 | 51.45 | 94.31 | 96.50 | 51.35 | 94.01 | 96.50 |
|    |   | RC     | 62.54 | 95.80 | 98.00 | 15.38 | 95.50 | 94.91 | 19.78 | 95.60 | 95.10 |
|    |   | UN     | 80.42 | 94.81 | 98.00 | 56.14 | 93.91 | 93.81 | 53.85 | 93.61 | 94.61 |
|    | + | ARH(1) | 77.73 | 94.71 | 97.60 | 51.55 | 95.30 | 95.10 | 49.05 | 95.10 | 95.40 |
|    |   | RC     | 11.39 | 94.11 | 97.30 | 00.40 | 93.81 | 95.90 | 00.40 | 93.81 | 96.30 |
|    |   | UN     | 72.33 | 94.71 | 97.40 | 52.35 | 94.01 | 93.91 | 49.05 | 93.81 | 95.40 |
|    | - | ARH(1) | 84.62 | 94.71 | 98.60 | 64.64 | 93.61 | 95.70 | 66.63 | 93.91 | 94.21 |
|    |   | RC     | 39.36 | 94.61 | 98.00 | 08.69 | 95.20 | 93.41 | 12.39 | 95.30 | 93.51 |
|    |   | UN     | 84.72 | 94.41 | 98.90 | 69.93 | 92.61 | 94.21 | 69.13 | 92.91 | 95.20 |
| 60 | = | ARH(1) | 66.03 | 95.00 | 97.60 | 39.56 | 93.21 | 94.81 | 40.26 | 93.31 | 94.61 |
|    |   | RC     | 06.09 | 94.31 | 97.90 | 00.40 | 94.11 | 95.10 | 00.50 | 94.41 | 95.80 |
|    |   | UN     | 65.63 | 94.61 | 98.20 | 42.76 | 93.51 | 95.50 | 39.68 | 93.81 | 95.60 |
|    | + | ARH(1) | 56.44 | 95.70 | 97.80 | 30.27 | 96.00 | 96.50 | 30.97 | 96.10 | 96.30 |
|    |   | RC     | 100.0 | 89.01 | 95.40 | 00.60 | 94.91 | 96.70 | 00.60 | 94.71 | 97.30 |
|    |   | UN     | 57.14 | 95.60 | 96.80 | 37.46 | 94.41 | 94.91 | 33.47 | 94.11 | 95.50 |
|    | - | ARH(1) | 80.12 | 94.91 | 98.20 | 52.15 | 94.31 | 96.30 | 54.05 | 94.01 | 95.50 |
|    |   | RC     | 23.78 | 94.71 | 97.20 | 01.70 | 94.01 | 93.51 | 02.50 | 94.11 | 93.61 |
|    |   | UN     | 80.02 | 94.51 | 97.90 | 56.84 | 93.01 | 94.71 | 56.24 | 93.31 | 94.91 |

**Note:** Sample Size (N), Relationship between sample and dispersion matrix size (R), Null relation between sample and dispersion matrix size (=), Positive relation between sample and dispersion matrix size (+), Negative relation between sample and dispersion matrix size (-), Original Covariance Structure (OCS), Akaike's Information Criterion (AIC), Correctly Identified Model (MCI), Type I error rates exceeding Bradley's liberal criterion (Boldface).

Table 17: Percentages of Power when data are not normally distributed (Moderate Bias -1,0,1,0) and trimmed 0.2 for covariance structures selecting

| N  | R | OCS    | BF    |       |       | AIC   |       |       | CIM   |       |       |
|----|---|--------|-------|-------|-------|-------|-------|-------|-------|-------|-------|
|    |   |        | Bet   | Wit   | Int   | Bet   | Wit   | Int   | Bet   | Wit   | Int   |
| 30 | = | ARH(1) | 92.11 | 94.81 | 99.80 | 66.83 | 94.21 | 96.00 | 68.33 | 93.91 | 96.80 |
|    |   | RC     | 51.65 | 92.21 | 98.30 | 10.39 | 92.61 | 93.31 | 11.79 | 92.61 | 94.21 |
|    |   | UN     | 88.11 | 91.61 | 99.40 | 67.03 | 93.21 | 97.00 | 66.53 | 93.11 | 97.50 |
|    | + | ARH(1) | 86.61 | 96.50 | 99.00 | 64.64 | 95.70 | 95.80 | 65.33 | 95.40 | 97.60 |
|    |   | RC     | 35.06 | 96.50 | 99.00 | 08.99 | 94.51 | 96.80 | 10.69 | 94.51 | 97.70 |
|    |   | UN     | 62.54 | 96.50 | 99.00 | 37.16 | 94.91 | 96.50 | 33.17 | 94.41 | 97.60 |
|    | - | ARH(1) | 95.90 | 92.31 | 99.10 | 74.93 | 91.31 | 96.00 | 77.92 | 91.31 | 97.00 |
|    |   | RC     | 78.92 | 91.11 | 98.40 | 25.97 | 89.01 | 90.81 | 30.87 | 89.11 | 92.51 |
|    |   | UN     | 90.31 | 93.11 | 98.90 | 56.44 | 90.81 | 95.10 | 56.64 | 90.21 | 95.90 |
| 45 | = | ARH(1) | 72.73 | 94.31 | 99.00 | 47.85 | 95.10 | 96.60 | 47.05 | 95.10 | 96.30 |
|    |   | RC     | 14.19 | 93.81 | 98.40 | 01.60 | 93.21 | 94.41 | 01.50 | 93.41 | 94.61 |
|    |   | UN     | 71.93 | 92.11 | 99.20 | 53.65 | 93.71 | 95.80 | 52.45 | 93.41 | 96.00 |
|    | + | ARH(1) | 65.83 | 92.91 | 97.90 | 45.05 | 95.10 | 96.00 | 43.86 | 95.10 | 96.20 |
|    |   | RC     | 05.89 | 92.91 | 98.80 | 01.00 | 93.81 | 95.30 | 00.80 | 94.11 | 96.60 |
|    |   | UN     | 65.35 | 92.91 | 98.10 | 49.75 | 94.91 | 95.40 | 46.95 | 95.20 | 96.00 |
|    | - | ARH(1) | 81.32 | 95.70 | 99.10 | 62.44 | 92.71 | 96.00 | 62.54 | 92.51 | 95.60 |
|    |   | RC     | 32.77 | 94.51 | 96.40 | 08.99 | 91.51 | 91.01 | 11.09 | 91.71 | 91.71 |
|    |   | UN     | 82.22 | 93.91 | 98.80 | 64.44 | 92.81 | 94.91 | 64.14 | 92.71 | 95.70 |
| 60 | = | ARH(1) | 58.24 | 90.61 | 97.80 | 34.37 | 92.91 | 94.61 | 35.36 | 92.61 | 94.71 |
|    |   | RC     | 02.70 | 92.01 | 97.60 | 00.40 | 92.11 | 92.61 | 00.20 | 93.11 | 92.61 |
|    |   | UN     | 57.54 | 91.51 | 98.90 | 40.46 | 93.81 | 95.90 | 39.16 | 94.01 | 96.00 |
|    | + | ARH(1) | 50.25 | 92.51 | 98.10 | 30.87 | 94.61 | 95.70 | 30.17 | 94.41 | 95.40 |
|    |   | RC     | 08.00 | 95.00 | 97.40 | 100.0 | 95.10 | 96.20 | 0.10  | 95.00 | 96.90 |
|    |   | UN     | 13.99 | 92.61 | 97.90 | 06.39 | 94.81 | 96.40 | 05.50 | 94.41 | 96.90 |
|    | - | ARH(1) | 75.02 | 90.61 | 98.40 | 48.25 | 91.01 | 96.50 | 47.75 | 91.01 | 96.20 |
|    |   | RC     | 16.28 | 91.81 | 96.60 | 01.30 | 90.31 | 90.21 | 01.60 | 90.41 | 90.51 |
|    |   | UN     | 74.93 | 91.41 | 98.60 | 52.75 | 91.91 | 94.71 | 51.55 | 92.21 | 94.81 |

**Note:** Sample Size (N), Relationship between sample and dispersion matrix size (R), Null relation between sample and dispersion matrix size (=), Positive relation between sample and dispersion matrix size (+), Negative relation between sample and dispersion matrix size (-), Original Covariance Structure (OCS), Akaike's Information Criterion (AIC), Correctly Identified Model (MCI), Type I error rates exceeding Bradley's liberal criterion (Boldface).

Table 18: Percentages of Power when data are not normally distributed (Strong Bias-1,0,1,0) and trimmed 0.2 for covariance structures selecting

| N  | R | OCS    | BF    |       |       | AIC   |       |       | CIM   |       |       |
|----|---|--------|-------|-------|-------|-------|-------|-------|-------|-------|-------|
|    |   |        | Bet   | Wit   | Int   | Bet   | Wit   | Int   | Bet   | Wit   | Int   |
| 30 | = | ARH(1) | 63.64 | 94.61 | 99.70 | 59.74 | 94.81 | 97.30 | 61.84 | 94.81 | 99.70 |
|    |   | RC     | 11.79 | 93.11 | 98.90 | 06.19 | 92.91 | 95.80 | 06.79 | 93.51 | 96.80 |
|    |   | UN     | 64.44 | 93.01 | 98.90 | 63.84 | 94.91 | 97.00 | 62.94 | 94.81 | 97.60 |
|    | + | ARH(1) | 56.84 | 95.40 | 99.50 | 57.34 | 96.10 | 97.60 | 59.24 | 95.90 | 98.40 |
|    |   | RC     | 09.19 | 96.20 | 99.00 | 07.49 | 96.60 | 96.10 | 08.19 | 96.60 | 97.50 |
|    |   | UN     | 67.94 | 95.40 | 98.90 | 59.84 | 96.30 | 97.40 | 61.04 | 96.50 | 98.40 |
|    | - | ARH(1) | 84.92 | 90.01 | 99.10 | 67.93 | 92.81 | 96.80 | 69.23 | 92.81 | 96.80 |
|    |   | RC     | 52.05 | 90.21 | 99.00 | 16.38 | 91.91 | 94.61 | 18.28 | 92.51 | 94.71 |
|    |   | UN     | 85.11 | 91.50 | 99.40 | 71.13 | 93.81 | 96.70 | 70.03 | 93.91 | 97.30 |
| 45 | = | ARH(1) | 23.48 | 89.41 | 98.60 | 40.56 | 94.11 | 97.60 | 41.86 | 94.01 | 97.90 |
|    |   | RC     | 00.70 | 89.71 | 96.40 | 01.50 | 93.31 | 95.30 | 01.50 | 93.31 | 95.50 |
|    |   | UN     | 31.37 | 88.71 | 98.60 | 45.15 | 92.51 | 97.10 | 42.76 | 92.61 | 97.20 |
|    | + | ARH(1) | 19.58 | 89.61 | 98.50 | 36.56 | 94.91 | 97.90 | 37.66 | 94.91 | 97.70 |
|    |   | RC     | 00.10 | 90.31 | 97.00 | 01.00 | 94.61 | 97.30 | 01.10 | 94.91 | 98.00 |
|    |   | UN     | 22.48 | 91.01 | 98.00 | 41.36 | 95.60 | 97.10 | 39.86 | 95.90 | 97.50 |
|    | - | ARH(1) | 46.05 | 92.41 | 98.40 | 47.65 | 92.31 | 97.30 | 48.45 | 92.71 | 96.60 |
|    |   | RC     | 07.39 | 94.11 | 96.30 | 05.39 | 91.21 | 92.91 | 06.09 | 91.31 | 93.81 |
|    |   | UN     | 54.35 | 92.51 | 98.80 | 53.55 | 93.11 | 97.20 | 53.65 | 92.91 | 97.50 |
| 60 | = | ARH(1) | 09.09 | 86.81 | 97.50 | 25.77 | 94.11 | 97.60 | 26.77 | 94.21 | 97.70 |
|    |   | RC     | 100.0 | 86.71 | 94.41 | 00.40 | 93.91 | 95.80 | 00.40 | 93.71 | 96.30 |
|    |   | UN     | 10.99 | 88.31 | 97.00 | 31.97 | 94.81 | 97.50 | 31.07 | 94.61 | 97.50 |
|    | + | ARH(1) | 06.19 | 89.11 | 95.70 | 23.98 | 96.00 | 96.60 | 23.78 | 95.90 | 97.00 |
|    |   | RC     | 00.90 | 87.31 | 94.41 | 01.30 | 90.91 | 93.11 | 01.50 | 91.31 | 93.61 |
|    |   | UN     | 10.39 | 88.91 | 95.60 | 29.57 | 93.81 | 96.80 | 29.07 | 94.01 | 96.90 |
|    | - | ARH(1) | 30.67 | 87.31 | 98.40 | 35.66 | 92.01 | 97.50 | 37.86 | 92.01 | 97.30 |
|    |   | RC     | 01.50 | 86.11 | 95.10 | 03.10 | 90.31 | 94.11 | 03.20 | 90.51 | 94.71 |
|    |   | UN     | 30.27 | 88.31 | 97.70 | 41.66 | 92.71 | 97.00 | 40.96 | 92.91 | 97.20 |

**Note:** Sample Size (N), Relationship between sample and dispersion matrix size (R), Null relation between sample and dispersion matrix size (=), Positive relation between sample and dispersion matrix size (+), Negative relation between sample and dispersion matrix size (-), Original Covariance

Structure (OCS), Akaike's Information Criterion (AIC), Correctly Identified Model (MCI), Type I error rates exceeding Bradley's liberal criterion (Boldface).

Table 19: Percentages of Power when data are not normally distributed (Slight Skewness -1,1,0,0) and trimmed at 0.1 for covariance structures selecting

| N  | R | OCS    | BF    |       |       | AIC   |       |       | CIM   |       |       |
|----|---|--------|-------|-------|-------|-------|-------|-------|-------|-------|-------|
|    |   |        | Bet   | Wit   | Int   | Bet   | Wit   | Int   | Bet   | Wit   | Int   |
| 30 | = | ARH(1) | 34.97 | 95.20 | 96.20 | 33.67 | 95.20 | 95.30 | 34.07 | 95.10 | 96.50 |
|    |   | RC     | 07.49 | 96.10 | 96.50 | 05.09 | 94.01 | 94.61 | 06.89 | 94.01 | 95.30 |
|    |   | UN     | 42.46 | 95.10 | 96.90 | 41.86 | 94.71 | 95.10 | 41.46 | 95.00 | 95.60 |
|    | + | ARH(1) | 33.37 | 96.50 | 95.60 | 35.16 | 95.10 | 95.50 | 33.27 | 94.31 | 95.60 |
|    |   | RC     | 03.80 | 96.30 | 95.30 | 03.80 | 96.00 | 94.41 | 04.00 | 96.40 | 95.20 |
|    |   | UN     | 39.16 | 95.90 | 96.30 | 45.55 | 95.30 | 95.20 | 39.26 | 94.91 | 97.30 |
|    | - | ARH(1) | 64.74 | 95.20 | 97.30 | 53.85 | 93.01 | 93.91 | 57.34 | 93.01 | 94.41 |
|    |   | RC     | 35.66 | 94.41 | 95.50 | 20.28 | 93.11 | 90.71 | 28.07 | 92.91 | 91.41 |
|    |   | UN     | 68.43 | 95.40 | 96.70 | 58.94 | 94.21 | 91.51 | 60.54 | 94.21 | 92.71 |
| 45 | = | ARH(1) | 16.88 | 95.60 | 95.80 | 15.48 | 93.81 | 95.20 | 16.98 | 93.81 | 96.00 |
|    |   | RC     | 00.90 | 96.00 | 95.10 | 00.60 | 95.70 | 93.71 | 00.90 | 95.60 | 94.31 |
|    |   | UN     | 20.98 | 94.61 | 94.91 | 21.98 | 92.81 | 94.41 | 20.78 | 92.91 | 94.71 |
|    | + | ARH(1) | 11.59 | 95.50 | 95.60 | 12.29 | 95.60 | 95.80 | 11.69 | 95.40 | 95.90 |
|    |   | RC     | 00.20 | 96.00 | 95.70 | 00.20 | 95.50 | 95.20 | 00.20 | 95.30 | 95.90 |
|    |   | UN     | 13.89 | 95.10 | 95.90 | 17.08 | 95.10 | 95.10 | 13.89 | 94.81 | 95.80 |
|    | - | ARH(1) | 39.36 | 94.91 | 94.91 | 33.87 | 93.01 | 94.81 | 33.76 | 93.31 | 94.31 |
|    |   | RC     | 07.39 | 95.90 | 96.00 | 03.40 | 94.31 | 92.81 | 05.99 | 94.31 | 93.91 |
|    |   | UN     | 42.76 | 92.31 | 96.40 | 39.36 | 89.91 | 94.21 | 39.26 | 90.51 | 95.00 |
| 60 | = | ARH(1) | 04.60 | 93.71 | 94.51 | 04.20 | 93.31 | 94.41 | 04.60 | 93.01 | 94.31 |
|    |   | RC     | 00.10 | 94.81 | 96.20 | 00.00 | 94.91 | 95.20 | 00.10 | 94.91 | 94.31 |
|    |   | UN     | 06.99 | 95.30 | 95.10 | 08.39 | 94.91 | 94.91 | 07.09 | 94.81 | 95.80 |
|    | + | ARH(1) | 03.10 | 94.31 | 94.71 | 03.30 | 94.71 | 95.40 | 03.10 | 94.61 | 95.50 |
|    |   | RC     | 100.0 | 95.80 | 94.81 | 100.0 | 95.10 | 94.71 | 100.0 | 94.91 | 95.40 |
|    |   | UN     | 05.39 | 96.10 | 95.70 | 06.19 | 95.60 | 94.81 | 05.49 | 95.50 | 95.50 |
|    | - | ARH(1) | 25.87 | 94.81 | 95.80 | 21.68 | 93.21 | 95.10 | 24.78 | 93.51 | 94.71 |
|    |   | RC     | 00.90 | 95.40 | 94.51 | 00.40 | 94.31 | 92.91 | 00.90 | 94.41 | 92.91 |
|    |   | UN     | 21.38 | 93.41 | 96.90 | 20.48 | 92.61 | 95.50 | 20.18 | 92.81 | 96.10 |

**Note:** Sample Size (N), Relationship between sample and dispersion matrix size (R), Null relation between sample and dispersion matrix size (=), Positive relation between sample and dispersion matrix size (+), Negative relation between sample and dispersion matrix size (-), Original Covariance Structure (OCS), Akaike's Information Criterion (AIC), Correctly Identified Model (MCI), Type I error rates exceeding Bradley's liberal criterion (Boldface).

Table 20: Percentages of Power when data are not normally distributed (Moderate Skewness  $-1,1,0,0$ ) and trimmed at 0.1 for covariance structures selecting

| N  | R | OCS    | BF    |       |       | AIC   |       |       | CIM   |       |       |
|----|---|--------|-------|-------|-------|-------|-------|-------|-------|-------|-------|
|    |   |        | Bet   | Wit   | Int   | Bet   | Wit   | Int   | Bet   | Wit   | Int   |
| 30 | = | ARH(1) | 35.76 | 96.20 | 96.40 | 34.37 | 94.71 | 95.50 | 34.47 | 94.21 | 96.40 |
|    |   | RC     | 07.59 | 95.40 | 96.90 | 06.39 | 92.91 | 93.71 | 06.79 | 92.71 | 94.61 |
|    |   | UN     | 42.06 | 95.80 | 97.40 | 42.46 | 93.31 | 95.70 | 40.96 | 93.01 | 96.70 |
|    | + | ARH(1) | 32.57 | 96.00 | 96.90 | 31.77 | 94.11 | 96.40 | 32.57 | 94.11 | 97.20 |
|    |   | RC     | 03.70 | 96.90 | 96.30 | 03.80 | 96.20 | 94.91 | 03.60 | 96.50 | 96.70 |
|    |   | UN     | 38.76 | 96.90 | 95.80 | 41.26 | 96.20 | 94.91 | 38.56 | 95.90 | 96.10 |
|    | - | ARH(1) | 62.94 | 93.51 | 98.60 | 52.15 | 89.81 | 96.10 | 53.45 | 89.51 | 96.80 |
|    |   | RC     | 27.07 | 92.61 | 95.40 | 15.28 | 90.21 | 88.81 | 19.58 | 89.01 | 90.61 |
|    |   | UN     | 63.44 | 94.21 | 98.00 | 55.24 | 91.11 | 94.51 | 54.85 | 90.81 | 95.60 |
| 45 | = | ARH(1) | 11.89 | 94.81 | 95.50 | 12.29 | 92.61 | 95.70 | 11.79 | 92.71 | 96.20 |
|    |   | RC     | 00.30 | 94.31 | 94.61 | 00.30 | 91.01 | 91.71 | 00.30 | 91.61 | 93.11 |
|    |   | UN     | 18.58 | 94.41 | 97.00 | 19.29 | 91.61 | 96.10 | 18.38 | 91.71 | 96.30 |
|    | + | ARH(1) | 10.39 | 94.81 | 96.90 | 10.39 | 94.31 | 96.30 | 10.49 | 94.11 | 97.00 |
|    |   | RC     | 00.40 | 96.20 | 96.60 | 00.40 | 95.40 | 94.81 | 00.40 | 95.20 | 95.10 |
|    |   | UN     | 14.79 | 96.20 | 95.50 | 16.68 | 95.70 | 94.81 | 14.79 | 95.70 | 95.70 |
|    | - | ARH(1) | 35.26 | 94.01 | 97.20 | 30.97 | 90.11 | 96.10 | 31.07 | 90.51 | 96.40 |
|    |   | RC     | 06.89 | 93.41 | 96.10 | 05.29 | 90.01 | 91.31 | 05.79 | 90.61 | 91.31 |
|    |   | UN     | 36.26 | 93.61 | 96.20 | 34.97 | 90.21 | 94.21 | 33.27 | 90.51 | 94.51 |
| 60 | = | ARH(1) | 05.19 | 96.00 | 95.50 | 04.80 | 93.91 | 96.60 | 05.09 | 93.91 | 96.00 |
|    |   | RC     | 00.20 | 96.10 | 95.60 | 00.10 | 95.00 | 95.10 | 00.10 | 95.10 | 93.91 |
|    |   | UN     | 08.29 | 94.91 | 96.10 | 08.99 | 94.11 | 94.71 | 08.19 | 94.01 | 95.00 |
|    | + | ARH(1) | 03.10 | 96.00 | 97.30 | 03.40 | 94.91 | 96.90 | 03.10 | 94.91 | 96.40 |
|    |   | RC     | 00.00 | 95.30 | 96.10 | 00.00 | 95.40 | 95.60 | 00.00 | 95.30 | 95.70 |
|    |   | UN     | 05.29 | 95.40 | 94.11 | 05.59 | 93.81 | 95.10 | 05.19 | 93.81 | 95.60 |
|    | - | ARH(1) | 18.88 | 92.91 | 95.90 | 15.88 | 90.81 | 95.00 | 17.98 | 91.31 | 94.71 |
|    |   | RC     | 01.60 | 94.51 | 95.00 | 00.60 | 91.21 | 92.11 | 00.90 | 91.41 | 92.71 |
|    |   | UN     | 20.28 | 93.91 | 96.70 | 18.88 | 91.21 | 95.50 | 18.98 | 91.81 | 95.50 |

**Note:** Sample Size (N), Relationship between sample and dispersion matrix size (R), Null relation between sample and dispersion matrix size (=), Positive relation between sample and dispersion matrix size (+), Negative relation between sample and dispersion matrix size (-), Original Covariance Structure (OCS), Akaike's Information Criterion (AIC), Correctly Identified Model (MCI), Type I error rates exceeding Bradley's liberal criterion (Boldface).

Table 21: Percentages of Power when data are not normally distributed (Strong Skewness -1,1,0,0) and trimmed at 0.1 for covariance structures selecting

| N  | R | OCS    | BF    |       |       | AIC   |       |       | CIM   |       |       |
|----|---|--------|-------|-------|-------|-------|-------|-------|-------|-------|-------|
|    |   |        | Bet   | Wit   | Int   | Bet   | Wit   | Int   | Bet   | Wit   | Int   |
| 30 | = | ARH(1) | 29.07 | 96.60 | 98.30 | 26.47 | 94.51 | 97.80 | 26.57 | 94.61 | 98.00 |
|    |   | RC     | 06.89 | 96.60 | 97.90 | 05.79 | 94.61 | 96.30 | 06.29 | 94.91 | 97.00 |
|    |   | UN     | 41.76 | 94.41 | 97.40 | 42.16 | 92.61 | 96.20 | 40.36 | 92.51 | 96.60 |
|    | + | ARH(1) | 25.27 | 95.90 | 97.70 | 23.88 | 95.50 | 96.80 | 24.08 | 95.20 | 97.80 |
|    |   | RC     | 04.80 | 97.80 | 98.50 | 03.60 | 97.00 | 96.70 | 04.20 | 96.80 | 98.00 |
|    |   | UN     | 37.26 | 96.20 | 96.40 | 39.46 | 94.81 | 96.40 | 36.96 | 94.91 | 97.00 |
|    | - | ARH(1) | 50.55 | 95.20 | 98.60 | 39.46 | 92.31 | 95.30 | 39.36 | 92.11 | 95.80 |
|    |   | RC     | 19.38 | 95.70 | 97.90 | 10.69 | 91.61 | 93.61 | 12.59 | 91.11 | 94.81 |
|    |   | UN     | 65.93 | 95.60 | 98.10 | 57.74 | 90.91 | 95.00 | 58.44 | 90.31 | 96.70 |
| 45 | = | ARH(1) | 11.09 | 96.90 | 97.00 | 10.59 | 94.91 | 96.90 | 10.99 | 94.91 | 96.80 |
|    |   | RC     | 01.10 | 95.20 | 96.20 | 09.00 | 93.11 | 95.20 | 00.90 | 93.41 | 95.60 |
|    |   | UN     | 18.48 | 95.70 | 96.40 | 18.78 | 94.71 | 95.90 | 17.78 | 94.81 | 96.30 |
|    | + | ARH(1) | 08.99 | 96.50 | 97.90 | 08.79 | 95.70 | 97.80 | 08.29 | 95.80 | 97.80 |
|    |   | RC     | 00.60 | 96.90 | 97.10 | 00.50 | 94.81 | 95.70 | 00.50 | 95.00 | 96.30 |
|    |   | UN     | 14.49 | 94.41 | 95.40 | 14.09 | 93.11 | 94.41 | 14.09 | 93.31 | 95.30 |
|    | - | ARH(1) | 25.47 | 95.50 | 98.00 | 21.18 | 92.41 | 97.70 | 21.68 | 92.31 | 97.40 |
|    |   | RC     | 05.39 | 94.21 | 97.20 | 04.60 | 89.91 | 94.21 | 04.60 | 90.11 | 94.91 |
|    |   | UN     | 40.26 | 95.40 | 96.30 | 37.56 | 92.51 | 95.80 | 36.76 | 92.71 | 96.00 |
| 60 | = | ARH(1) | 05.59 | 96.60 | 96.30 | 04.80 | 94.41 | 96.20 | 05.39 | 94.51 | 96.30 |
|    |   | RC     | 00.40 | 95.20 | 96.60 | 00.40 | 93.51 | 94.01 | 00.40 | 93.61 | 94.31 |
|    |   | UN     | 07.29 | 94.81 | 96.00 | 08.49 | 93.31 | 95.00 | 07.19 | 93.61 | 94.61 |
|    | + | ARH(1) | 03.00 | 96.30 | 96.00 | 02.50 | 96.20 | 97.00 | 02.70 | 96.20 | 96.80 |
|    |   | RC     | 00.10 | 96.30 | 96.50 | 00.10 | 95.60 | 95.00 | 00.10 | 95.40 | 95.40 |
|    |   | UN     | 05.79 | 96.40 | 96.30 | 06.59 | 96.20 | 96.60 | 05.79 | 95.90 | 96.90 |
|    | - | ARH(1) | 11.39 | 95.60 | 98.70 | 10.19 | 92.21 | 96.80 | 09.99 | 92.41 | 97.30 |
|    |   | RC     | 02.30 | 95.60 | 96.60 | 01.70 | 92.11 | 93.31 | 01.90 | 92.51 | 93.71 |
|    |   | UN     | 19.58 | 94.51 | 97.30 | 18.98 | 93.21 | 95.60 | 17.68 | 93.61 | 95.80 |

**Note:** Sample Size (N), Relationship between sample and dispersion matrix size (R), Null relation between sample and dispersion matrix size (=), Positive relation between sample and dispersion matrix size (+), Negative relation between sample and dispersion matrix size (-), Original Covariance Structure (OCS), Akaike's Information Criterion (AIC), Correctly Identified Model (MCI), Type I error rates exceeding Bradley's liberal criterion (Boldface).



Table 22: Percentages of Power when data are not normally distributed (Slight Skewness -1,1,0,0) and trimmed at 0.2 for covariance structures selecting

| N  | R | OCS     | BF    |       |       | AIC   |       |       | CIM   |       |       |
|----|---|---------|-------|-------|-------|-------|-------|-------|-------|-------|-------|
|    |   |         | Bet   | Wit   | Int   | Bet   | Wit   | Int   | Bet   | Wit   | Int   |
| 30 | = | ARH(1)  | 79.82 | 95.90 | 98.90 | 37.16 | 95.00 | 95.60 | 38.96 | 95.20 | 96.70 |
|    |   | RC      | 39.86 | 94.51 | 98.00 | 05.29 | 93.51 | 94.01 | 06.59 | 94.51 | 95.50 |
|    |   | UN      | 80.42 | 95.60 | 98.70 | 47.05 | 95.40 | 95.50 | 45.15 | 94.81 | 97.00 |
|    | + | ARH (1) | 69.13 | 95.40 | 98.50 | 36.46 | 95.70 | 96.00 | 32.97 | 95.40 | 97.20 |
|    |   | RC      | 23.08 | 95.80 | 98.50 | 04.10 | 94.91 | 95.90 | 05.00 | 94.51 | 96.80 |
|    |   | UN      | 68.03 | 96.50 | 98.60 | 41.66 | 95.60 | 94.21 | 35.76 | 94.91 | 96.20 |
|    | - | ARH (1) | 93.51 | 93.51 | 98.90 | 56.24 | 92.51 | 92.71 | 58.84 | 92.41 | 93.91 |
|    |   | RC      | 76.32 | 93.31 | 98.80 | 17.98 | 92.01 | 90.11 | 23.78 | 92.61 | 90.91 |
|    |   | UN      | 91.91 | 94.11 | 99.20 | 59.14 | 93.21 | 93.01 | 62.24 | 92.71 | 93.71 |
| 45 | = | ARH(1)  | 49.55 | 95.80 | 98.00 | 13.99 | 94.61 | 94.71 | 15.78 | 94.71 | 93.81 |
|    |   | RC      | 09.41 | 94.71 | 98.30 | 00.40 | 94.21 | 94.21 | 00.90 | 94.31 | 94.51 |
|    |   | UN      | 52.81 | 94.01 | 97.20 | 23.48 | 93.91 | 94.61 | 20.58 | 94.31 | 95.40 |
|    | + | ARH (1) | 35.96 | 95.10 | 98.00 | 10.59 | 95.60 | 96.20 | 09.79 | 95.40 | 95.50 |
|    |   | RC      | 03.10 | 94.91 | 96.70 | 00.20 | 95.60 | 93.91 | 00.30 | 95.00 | 94.61 |
|    |   | UN      | 39.46 | 93.81 | 97.80 | 18.48 | 94.51 | 94.61 | 16.38 | 94.21 | 95.20 |
|    | - | ARH (1) | 64.14 | 94.11 | 98.50 | 27.77 | 93.61 | 95.20 | 29.57 | 93.21 | 94.61 |
|    |   | RC      | 22.08 | 94.21 | 98.50 | 02.70 | 92.81 | 94.81 | 04.30 | 93.21 | 93.11 |
|    |   | UN      | 63.84 | 95.20 | 97.70 | 39.36 | 92.71 | 94.21 | 38.96 | 93.11 | 94.71 |
| 60 | = | ARH(1)  | 27.67 | 94.11 | 98.50 | 03.20 | 94.31 | 95.40 | 03.70 | 94.21 | 95.50 |
|    |   | RC      | 01.40 | 95.00 | 97.90 | 100.0 | 92.81 | 94.61 | 00.10 | 92.91 | 95.20 |
|    |   | UN      | 29.97 | 92.81 | 97.40 | 07.99 | 92.91 | 94.51 | 06.59 | 93.31 | 94.91 |
|    | + | ARH (1) | 18.98 | 94.21 | 98.00 | 03.20 | 94.11 | 96.40 | 02.80 | 93.91 | 95.80 |
|    |   | RC      | 00.20 | 94.81 | 97.20 | 100.0 | 94.91 | 95.60 | 100.0 | 94.91 | 95.30 |
|    |   | UN      | 22.28 | 95.10 | 97.50 | 05.89 | 95.20 | 94.91 | 04.40 | 95.20 | 94.81 |
|    | - | ARH (1) | 53.35 | 94.51 | 98.40 | 15.88 | 94.21 | 96.20 | 17.18 | 93.81 | 95.50 |
|    |   | RC      | 10.69 | 94.21 | 97.40 | 00.80 | 92.81 | 93.11 | 01.30 | 92.71 | 92.51 |
|    |   | UN      | 52.75 | 94.21 | 98.20 | 22.08 | 93.61 | 93.51 | 21.38 | 93.51 | 93.91 |

**Note:** Sample Size (N), Relationship between sample and dispersion matrix size (R), Null relation between sample and dispersion matrix size (=), Positive relation between sample and dispersion matrix size (+), Negative relation between sample and dispersion matrix size (-), Original Covariance Structure (OCS), Akaike's Information Criterion (AIC), Correctly Identified Model (MCI), Type I error rates exceeding Bradley's liberal criterion (Boldface).

Table 23: Percentages of Power when data are not normally distributed (Moderate Skewness  $-1,1,0,0$ ) and trimmed at 0.2 for covariance structures selecting

| N  | R | OCS     | BF    |       |       | AIC   |       |       | CIM   |       |       |
|----|---|---------|-------|-------|-------|-------|-------|-------|-------|-------|-------|
|    |   |         | Bet   | Wit   | Int   | Bet   | Wit   | Int   | Bet   | Wit   | Int   |
| 30 | = | ARH(1)  | 35.86 | 94.61 | 97.40 | 35.06 | 92.61 | 96.50 | 34.37 | 92.21 | 96.90 |
|    |   | RC      | 32.87 | 94.41 | 98.30 | 05.79 | 94.81 | 94.11 | 06.99 | 94.11 | 96.00 |
|    |   | UN      | 76.42 | 94.01 | 99.50 | 43.56 | 93.21 | 95.10 | 42.06 | 92.91 | 96.90 |
|    | + | ARH (1) | 31.97 | 94.51 | 96.90 | 35.26 | 95.50 | 95.80 | 32.17 | 94.71 | 96.30 |
|    |   | RC      | 18.78 | 96.40 | 99.00 | 02.70 | 95.70 | 95.60 | 03.30 | 95.40 | 96.80 |
|    |   | UN      | 62.64 | 96.50 | 99.00 | 37.16 | 94.91 | 96.50 | 33.17 | 94.41 | 97.60 |
|    | - | ARH (1) | 65.13 | 94.51 | 97.40 | 54.75 | 92.71 | 93.61 | 58.94 | 92.81 | 94.01 |
|    |   | RC      | 68.43 | 91.01 | 98.70 | 16.58 | 87.91 | 89.91 | 20.99 | 88.11 | 91.11 |
|    |   | UN      | 90.31 | 93.11 | 98.90 | 56.44 | 90.81 | 95.10 | 56.64 | 90.21 | 95.90 |
| 45 | = | ARH(1)  | 14.59 | 94.81 | 97.10 | 14.39 | 93.41 | 95.80 | 14.49 | 93.31 | 95.50 |
|    |   | RC      | 04.30 | 92.31 | 97.50 | 00.60 | 92.81 | 93.51 | 00.90 | 92.61 | 94.61 |
|    |   | UN      | 44.56 | 93.01 | 98.80 | 19.58 | 92.91 | 95.50 | 18.38 | 93.21 | 96.20 |
|    | + | ARH (1) | 11.39 | 94.11 | 95.90 | 11.89 | 93.61 | 96.80 | 11.49 | 93.51 | 96.30 |
|    |   | RC      | 01.80 | 93.81 | 98.10 | 00.50 | 95.40 | 96.20 | 00.50 | 95.30 | 96.40 |
|    |   | UN      | 31.67 | 94.81 | 98.80 | 16.08 | 95.40 | 94.51 | 14.09 | 95.60 | 95.70 |
|    | - | ARH (1) | 35.86 | 94.41 | 96.40 | 30.97 | 93.41 | 95.50 | 32.87 | 93.51 | 94.01 |
|    |   | RC      | 16.78 | 93.11 | 98.10 | 03.70 | 90.71 | 91.41 | 06.61 | 90.81 | 91.11 |
|    |   | UN      | 31.67 | 94.81 | 98.80 | 16.08 | 95.40 | 94.51 | 14.09 | 95.60 | 95.70 |
| 60 | = | ARH(1)  | 04.90 | 96.60 | 94.91 | 04.00 | 94.91 | 95.60 | 05.00 | 95.00 | 95.80 |
|    |   | RC      | 100.0 | 94.81 | 95.50 | 100.0 | 95.00 | 95.40 | 00.10 | 95.30 | 95.80 |
|    |   | UN      | 21.21 | 91.91 | 98.20 | 07.09 | 94.11 | 95.40 | 06.49 | 94.11 | 96.10 |
|    | + | ARH (1) | 03.00 | 94.71 | 94.51 | 03.30 | 95.20 | 94.61 | 03.00 | 95.00 | 94.41 |
|    |   | RC      | 00.70 | 92.91 | 97.00 | 100.0 | 93.81 | 93.31 | 100.0 | 93.81 | 94.11 |
|    |   | UN      | 13.99 | 92.61 | 97.90 | 06.39 | 94.81 | 96.40 | 05.59 | 94.91 | 96.90 |
|    | - | ARH (1) | 17.68 | 92.91 | 94.51 | 13.79 | 91.31 | 94.71 | 16.68 | 91.31 | 93.61 |
|    |   | RC      | 06.59 | 89.81 | 96.60 | 01.10 | 90.21 | 91.41 | 01.20 | 90.21 | 91.71 |
|    |   | UN      | 43.26 | 92.21 | 98.00 | 18.48 | 92.21 | 95.50 | 19.18 | 92.91 | 96.00 |

**Note:** Sample Size (N), Relationship between sample and dispersion matrix size (R), Null relation between sample and dispersion matrix size (=), Positive relation between sample and dispersion matrix size (+), Negative relation between sample and dispersion matrix size (-), Original Covariance Structure (OCS), Akaike's Information Criterion (AIC), Correctly Identified Model (MCI), Type I error rates exceeding Bradley's liberal criterion (Boldface).

Table 24: Percentages of Power when data are not normally distributed (Strong Skewness -1,1,0,0) and trimmed at 0.2 for covariance structures selecting

| N  | R | OCS     | BF    |       |       | AIC   |       |       | CIM   |       |       |
|----|---|---------|-------|-------|-------|-------|-------|-------|-------|-------|-------|
|    |   |         | Bet   | Wit   | Int   | Bet   | Wit   | Int   | Bet   | Wit   | Int   |
| 30 | = | ARH(1)  | 26.97 | 97.50 | 98.40 | 25.27 | 94.91 | 98.20 | 25.27 | 95.00 | 98.10 |
|    |   | RC      | 05.19 | 93.01 | 99.30 | 05.69 | 94.01 | 96.10 | 06.09 | 94.31 | 97.10 |
|    |   | UN      | 32.07 | 92.91 | 99.40 | 32.37 | 93.81 | 97.20 | 31.97 | 94.11 | 97.30 |
|    | + | ARH (1) | 23.48 | 96.30 | 97.70 | 22.38 | 96.00 | 97.70 | 21.88 | 96.10 | 97.90 |
|    |   | RC      | 04.60 | 95.20 | 98.90 | 03.20 | 96.20 | 97.90 | 03.80 | 96.40 | 98.60 |
|    |   | UN      | 24.98 | 94.71 | 98.30 | 27.07 | 96.30 | 97.10 | 26.47 | 96.50 | 97.20 |
|    | - | ARH (1) | 48.25 | 98.31 | 98.80 | 36.76 | 90.61 | 96.40 | 37.96 | 90.91 | 96.00 |
|    |   | RC      | 42.36 | 91.61 | 99.20 | 13.19 | 92.21 | 93.91 | 14.09 | 92.91 | 94.71 |
|    |   | UN      | 66.23 | 89.91 | 99.40 | 42.46 | 93.01 | 96.40 | 41.26 | 93.11 | 97.10 |
| 45 | = | ARH(1)  | 11.99 | 95.90 | 97.70 | 10.69 | 94.21 | 96.60 | 11.79 | 94.41 | 96.80 |
|    |   | RC      | 00.20 | 90.41 | 97.60 | 01.70 | 93.71 | 96.00 | 01.70 | 93.81 | 96.30 |
|    |   | UN      | 04.50 | 89.11 | 97.40 | 14.59 | 93.61 | 97.00 | 14.69 | 93.51 | 97.00 |
|    | + | ARH (1) | 09.19 | 96.10 | 97.40 | 08.29 | 95.20 | 96.80 | 08.59 | 95.20 | 97.30 |
|    |   | RC      | 100.0 | 91.61 | 97.30 | 00.60 | 95.30 | 96.90 | 00.60 | 95.60 | 97.10 |
|    |   | UN      | 00.30 | 90.31 | 98.00 | 11.79 | 95.00 | 97.00 | 12.19 | 95.30 | 97.30 |
|    | - | ARH (1) | 23.58 | 94.71 | 98.40 | 17.78 | 90.01 | 97.10 | 18.78 | 90.71 | 97.10 |
|    |   | RC      | 04.50 | 89.71 | 97.00 | 04.30 | 92.11 | 94.31 | 04.50 | 92.51 | 94.21 |
|    |   | UN      | 22.68 | 91.71 | 98.70 | 22.38 | 92.71 | 96.90 | 23.28 | 92.81 | 96.70 |
| 60 | = | ARH(1)  | 04.20 | 95.40 | 97.00 | 03.08 | 94.01 | 96.60 | 04.10 | 93.81 | 96.90 |
|    |   | RC      | 100.0 | 94.81 | 95.50 | 100.0 | 95.00 | 95.40 | 00.10 | 95.30 | 95.80 |
|    |   | UN      | 00.90 | 86.41 | 97.40 | 05.39 | 93.31 | 96.10 | 05.69 | 93.61 | 96.30 |
|    | + | ARH (1) | 02.80 | 96.20 | 97.30 | 02.50 | 95.60 | 98.00 | 02-60 | 95.60 | 97.60 |
|    |   | RC      | 100.0 | 95.21 | 95.70 | 00.10 | 95.50 | 95.80 | 00.10 | 95.50 | 96.00 |
|    |   | UN      | 00.30 | 88.31 | 95.40 | 05.00 | 95.70 | 97.90 | 05.09 | 95.50 | 98.20 |
|    | - | ARH (1) | 11.39 | 96.10 | 97.70 | 10.49 | 94.81 | 96.30 | 10.49 | 95.00 | 96.20 |
|    |   | RC      | 00.90 | 88.61 | 95.20 | 01.60 | 92.51 | 93.21 | 01.80 | 92.61 | 93.21 |
|    |   | UN      | 08.89 | 87.11 | 97.40 | 12.59 | 92.41 | 96.70 | 12.59 | 92.21 | 97.00 |

**Note:** Sample Size (N), Relationship between sample and dispersion matrix size (R), Null relation between sample and dispersion matrix size (=), Positive relation between sample and dispersion matrix size (+), Negative relation between sample and dispersion matrix size (-), Original Covariance Structure (OCS), Akaike's Information Criterion (AIC), Correctly Identified Model (MCI), Type I error rates exceeding Bradley's liberal criterion (Boldface).

Table 25: Percentages of Power when data are not normally distributed (Slight Skewness -1,0,0,1) and trimmed at 0.1 for covariance structures selecting

| N  | R | OCS     | BF       |          |          | AIC      |          |          | CIM      |          |          |
|----|---|---------|----------|----------|----------|----------|----------|----------|----------|----------|----------|
|    |   |         | Bet<br>2 | Wit<br>1 | Int<br>3 | Bet<br>5 | Wit<br>4 | Int<br>6 | Bet<br>8 | Wit<br>7 | Int<br>9 |
| 30 | = | ARH(1)  | 77.12    | 95.40    | 96.00    | 75.72    | 95.30    | 94.01    | 77.12    | 95.40    | 96.10    |
|    |   | RC      | 46.45    | 95.40    | 94.71    | 35.46    | 93.81    | 93.11    | 44.46    | 94.01    | 94.21    |
|    |   | UN      | 68.13    | 95.60    | 96.20    | 70.23    | 94.61    | 95.20    | 67.73    | 94.51    | 96.80    |
|    | + | ARH (1) | 74.33    | 95.00    | 95.80    | 75.32    | 95.40    | 95.10    | 74.23    | 94.81    | 95.60    |
|    |   | RC      | 42.36    | 96.60    | 95.80    | 35.96    | 96.40    | 94.71    | 41.86    | 96.70    | 96.00    |
|    |   | UN      | 67.73    | 95.60    | 95.80    | 70.23    | 95.50    | 93.91    | 67.83    | 95.00    | 95.40    |
|    | - | ARH (1) | 86.51    | 95.50    | 96.20    | 79.82    | 95.00    | 93.61    | 82.92    | 95.60    | 94.21    |
|    |   | RC      | 77.02    | 94.11    | 96.10    | 59.84    | 91.91    | 91.31    | 70.23    | 91.61    | 91.31    |
|    |   | UN      | 84.92    | 93.81    | 97.30    | 77.12    | 92.01    | 92.51    | 80.82    | 92.21    | 95.30    |
| 45 | = | ARH(1)  | 59.64    | 95.20    | 94.81    | 55.74    | 94.91    | 93.21    | 59.04    | 94.91    | 93.81    |
|    |   | RC      | 21.48    | 95.30    | 95.20    | 18.48    | 93.61    | 94.11    | 21.48    | 93.71    | 94.91    |
|    |   | UN      | 53.65    | 95.00    | 95.60    | 56.44    | 94.21    | 94.31    | 53.35    | 94.41    | 94.91    |
|    | + | ARH (1) | 61.04    | 95.50    | 94.41    | 61.64    | 94.71    | 95.30    | 60.94    | 94.51    | 95.60    |
|    |   | RC      | 15.28    | 93.31    | 94.91    | 14.19    | 93.61    | 93.81    | 15.48    | 93.71    | 94.91    |
|    |   | UN      | 48.74    | 95.40    | 95.80    | 53.35    | 95.10    | 95.60    | 48.95    | 94.81    | 95.60    |
|    | - | ARH (1) | 76.72    | 95.60    | 94.51    | 72.43    | 95.20    | 93.01    | 74.43    | 94.41    | 94.01    |
|    |   | RC      | 47.05    | 94.61    | 96.70    | 33.17    | 93.71    | 94.31    | 41.46    | 93.81    | 92.91    |
|    |   | UN      | 66.23    | 95.20    | 96.50    | 65.93    | 93.51    | 93.01    | 64.44    | 93.81    | 95.10    |
| 60 | = | ARH(1)  | 50.55    | 94.31    | 95.70    | 49.55    | 94.71    | 95.80    | 50.35    | 94.81    | 95.20    |
|    |   | RC      | 06.59    | 95.10    | 95.30    | 05.69    | 93.61    | 93.51    | 06.69    | 93.61    | 94.21    |
|    |   | UN      | 39.36    | 94.41    | 95.30    | 41.86    | 92.31    | 95.50    | 39.56    | 92.51    | 95.80    |
|    | + | ARH (1) | 46.25    | 95.10    | 94.81    | 47.85    | 94.81    | 95.70    | 46.25    | 95.20    | 95.30    |
|    |   | RC      | 04.60    | 94.71    | 95.10    | 04.50    | 93.91    | 95.00    | 04.60    | 94.01    | 94.81    |
|    |   | UN      | 33.57    | 94.21    | 95.40    | 36.76    | 93.81    | 94.71    | 33.47    | 94.21    | 95.00    |
|    | - | ARH (1) | 63.44    | 95.10    | 95.30    | 62.14    | 95.30    | 95.30    | 62.44    | 95.30    | 95.10    |
|    |   | RC      | 23.78    | 94.71    | 95.70    | 16.18    | 93.91    | 95.30    | 21.58    | 94.21    | 94.31    |
|    |   | UN      | 55.64    | 93.81    | 96.00    | 55.54    | 94.01    | 95.90    | 53.75    | 93.91    | 94.71    |

**Note:** Sample Size (N), Relationship between sample and dispersion matrix size (R), Null relation between sample and dispersion matrix size (=), Positive relation between sample and dispersion matrix size (+), Negative relation between sample and dispersion matrix size (-), Original Covariance

Structure (OCS), Akaike's Information Criterion (AIC), Correctly Identified Model (MCI), Type I error rates exceeding Bradley's liberal criterion (Boldface).

Table 26: Percentages of Power when data are not normally distributed (Moderate Skewness  $-1,0,0,1$ ) and trimmed at 0.1 for covariance structures selecting

| N  | R | OCS     | BF    |       |       | AIC   |       |       | CIM   |       |       |
|----|---|---------|-------|-------|-------|-------|-------|-------|-------|-------|-------|
|    |   |         | Bet   | Wit   | Int   | Bet   | Wit   | Int   | Bet   | Wit   | Int   |
| 30 | = | ARH(1)  | 69.23 | 94.61 | 97.70 | 66.83 | 93.21 | 96.90 | 68.63 | 92.41 | 97.40 |
|    |   | RC      | 48.15 | 96.30 | 97.40 | 38.86 | 91.81 | 94.61 | 46.55 | 92.31 | 95.70 |
|    |   | UN      | 68.93 | 94.61 | 97.20 | 69.53 | 93.61 | 95.90 | 68.83 | 93.21 | 96.40 |
|    | + | ARH (1) | 66.33 | 95.60 | 96.20 | 65.03 | 95.10 | 96.60 | 65.53 | 94.71 | 96.50 |
|    |   | RC      | 42.16 | 96.10 | 97.20 | 35.86 | 94.71 | 95.60 | 41.86 | 94.41 | 96.70 |
|    |   | UN      | 68.53 | 96.20 | 98.00 | 70.23 | 95.10 | 97.50 | 69.43 | 95.50 | 98.30 |
|    | - | ARH (1) | 86.21 | 93.21 | 98.60 | 78.92 | 90.21 | 95.00 | 80.32 | 90.41 | 95.00 |
|    |   | RC      | 75.62 | 94.91 | 97.30 | 58.64 | 89.31 | 89.31 | 66.33 | 88.01 | 90.41 |
|    |   | UN      | 85.41 | 94.81 | 97.90 | 77.52 | 91.41 | 94.71 | 78.52 | 91.41 | 96.50 |
| 45 | = | ARH(1)  | 49.95 | 94.01 | 96.80 | 47.65 | 91.71 | 95.40 | 49.25 | 91.61 | 96.60 |
|    |   | RC      | 15.28 | 95.40 | 96.00 | 11.39 | 92.91 | 93.11 | 14.59 | 93.11 | 93.61 |
|    |   | UN      | 50.85 | 95.30 | 95.80 | 53.65 | 93.91 | 94.91 | 50.45 | 93.61 | 96.00 |
|    | + | ARH (1) | 46.75 | 95.90 | 96.00 | 45.85 | 95.10 | 95.70 | 46.55 | 94.91 | 95.30 |
|    |   | RC      | 13.79 | 94.71 | 95.50 | 12.39 | 94.11 | 95.50 | 13.79 | 94.21 | 96.00 |
|    |   | UN      | 47.15 | 96.40 | 96.30 | 49.25 | 95.00 | 96.30 | 46.95 | 94.81 | 96.20 |
|    | - | ARH (1) | 65.33 | 95.00 | 96.50 | 60.54 | 91.91 | 96.50 | 61.94 | 91.91 | 95.80 |
|    |   | RC      | 45.65 | 95.80 | 96.50 | 33.57 | 91.71 | 91.61 | 39.86 | 91.91 | 92.41 |
|    |   | UN      | 67.03 | 96.00 | 96.90 | 64.84 | 92.21 | 93.21 | 63.44 | 92.01 | 93.71 |
| 60 | = | ARH(1)  | 34.07 | 94.81 | 94.91 | 34.57 | 93.21 | 94.91 | 33.87 | 93.31 | 94.21 |
|    |   | RC      | 06.79 | 94.71 | 95.30 | 05.49 | 93.41 | 94.41 | 06.79 | 93.41 | 94.21 |
|    |   | UN      | 39.26 | 95.40 | 96.30 | 39.46 | 93.91 | 95.60 | 38.66 | 94.11 | 95.90 |
|    | + | ARH (1) | 30.37 | 94.01 | 95.40 | 30.57 | 93.91 | 95.70 | 30.27 | 93.81 | 96.40 |
|    |   | RC      | 02.70 | 95.10 | 94.61 | 02.80 | 94.51 | 95.20 | 02.70 | 94.31 | 95.60 |
|    |   | UN      | 35.06 | 95.00 | 95.00 | 36.76 | 94.51 | 95.60 | 35.26 | 94.91 | 96.00 |
|    | - | ARH (1) | 51.55 | 94.61 | 96.40 | 47.85 | 91.01 | 95.90 | 48.65 | 91.11 | 94.81 |
|    |   | RC      | 20.98 | 93.21 | 95.40 | 16.38 | 89.71 | 90.61 | 19.18 | 90.21 | 90.51 |
|    |   | UN      | 52.05 | 93.61 | 95.90 | 50.95 | 91.71 | 93.21 | 49.15 | 91.71 | 93.81 |

**Note:** Sample Size (N), Relationship between sample and dispersion matrix size (R), Null relation between sample and dispersion matrix size (=), Positive relation between sample and dispersion matrix size (+), Negative relation between sample and dispersion matrix size (-), Original Covariance

Structure (OCS), Akaike's Information Criterion (AIC), Correctly Identified Model (MCI), Type I error rates exceeding Bradley's liberal criterion (Boldface).

Table 27: Percentages of Power when data are not normally distributed (Strong Skewness -1,0,0,1) and trimmed at 0.1 for covariance structures selecting

| N  | R | OCS     | BF    |       |       | AIC   |       |       | CIM   |       |       |
|----|---|---------|-------|-------|-------|-------|-------|-------|-------|-------|-------|
|    |   |         | Bet   | Wit   | Int   | Bet   | Wit   | Int   | Bet   | Wit   | Int   |
| 30 | = | ARH(1)  | 59.54 | 96.70 | 98.40 | 58.14 | 94.41 | 97.50 | 57.74 | 94.31 | 97.30 |
|    |   | RC      | 33.47 | 96.10 | 97.90 | 27.07 | 93.91 | 96.50 | 30.47 | 94.41 | 97.30 |
|    |   | UN      | 60.94 | 95.90 | 97.80 | 60.84 | 93.31 | 97.10 | 59.64 | 93.21 | 97.90 |
|    | + | ARH (1) | 61.94 | 97.10 | 97.90 | 56.64 | 96.50 | 97.60 | 59.24 | 96.80 | 97.60 |
|    |   | RC      | 30.57 | 96.60 | 98.00 | 26.37 | 96.00 | 97.20 | 28.67 | 96.00 | 98.00 |
|    |   | UN      | 57.64 | 97.10 | 98.20 | 56.44 | 96.40 | 98.10 | 56.44 | 96.40 | 98.10 |
|    | - | ARH (1) | 75.12 | 95.10 | 98.70 | 66.93 | 91.41 | 96.40 | 68.53 | 91.41 | 96.00 |
|    |   | RC      | 58.54 | 94.21 | 97.80 | 44.76 | 90.71 | 95.20 | 48.45 | 91.51 | 95.40 |
|    |   | UN      | 78.10 | 94.91 | 98.10 | 69.73 | 91.91 | 95.60 | 72.13 | 92.01 | 96.10 |
| 45 | = | ARH(1)  | 41.16 | 96.20 | 98.00 | 40.56 | 94.21 | 97.80 | 40.76 | 94.01 | 97.60 |
|    |   | RC      | 13.09 | 96.10 | 97.50 | 11.29 | 94.61 | 96.90 | 12.09 | 94.61 | 97.00 |
|    |   | UN      | 43.46 | 95.70 | 97.50 | 43.36 | 94.11 | 97.10 | 42.56 | 94.21 | 96.80 |
|    | + | ARH (1) | 37.26 | 96.60 | 97.80 | 35.96 | 95.60 | 97.40 | 36.06 | 96.00 | 96.60 |
|    |   | RC      | 10.09 | 96.70 | 97.50 | 09.09 | 95.70 | 96.80 | 08.89 | 95.80 | 97.00 |
|    |   | UN      | 43.06 | 95.50 | 97.70 | 43.06 | 95.60 | 97.30 | 42.36 | 95.60 | 97.10 |
|    | - | ARH (1) | 53.35 | 95.80 | 97.80 | 47.95 | 92.51 | 97.60 | 48.95 | 92.61 | 96.60 |
|    |   | RC      | 31.17 | 94.21 | 97.50 | 23.48 | 91.41 | 94.31 | 25.37 | 91.91 | 94.51 |
|    |   | UN      | 59.44 | 95.00 | 97.90 | 55.54 | 91.61 | 96.30 | 54.55 | 91.91 | 96.50 |
| 60 | = | ARH(1)  | 29.57 | 96.10 | 97.20 | 29.07 | 95.00 | 97.20 | 29.27 | 95.20 | 96.80 |
|    |   | RC      | 04.50 | 96.00 | 96.90 | 04.00 | 92.91 | 94.91 | 04.00 | 93.31 | 95.30 |
|    |   | UN      | 32.97 | 95.50 | 97.20 | 33.17 | 93.41 | 96.30 | 32.57 | 93.31 | 96.10 |
|    | + | ARH (1) | 25.07 | 95.50 | 95.60 | 24.08 | 94.71 | 96.90 | 24.38 | 95.00 | 97.00 |
|    |   | RC      | 02.30 | 97.30 | 96.10 | 01.90 | 95.70 | 96.10 | 01.80 | 95.90 | 96.10 |
|    |   | UN      | 28.87 | 96.90 | 97.40 | 29.77 | 95.30 | 97.00 | 28.77 | 95.30 | 97.40 |
|    | - | ARH (1) | 38.66 | 93.81 | 97.50 | 35.26 | 90.81 | 96.80 | 36.06 | 91.11 | 97.00 |
|    |   | RC      | 10.99 | 96.10 | 96.80 | 09.09 | 92.31 | 94.41 | 09.09 | 92.31 | 94.51 |
|    |   | UN      | 42.06 | 94.81 | 96.30 | 39.66 | 91.41 | 95.10 | 39.56 | 91.21 | 95.20 |

**Note:** Sample Size (N), Relationship between sample and dispersion matrix size (R), Null relation between sample and dispersion matrix size (=), Positive relation between sample and dispersion matrix size (+), Negative relation between sample and dispersion matrix size (-), Original Covariance

Structure (OCS), Akaike's Information Criterion (AIC), Correctly Identified Model (MCI), Type I error rates exceeding Bradley's liberal criterion (Boldface).

Table 28: Percentages of Power when data are not normally distributed (Slight Skewness  $-1,0,0,1$ ) and trimmed at 0.2 for covariance structures selecting

| N  | R | OCS    | BF    |       |       | AIC   |       |       | CIM   |       |       |
|----|---|--------|-------|-------|-------|-------|-------|-------|-------|-------|-------|
|    |   |        | Bet   | Wit   | Int   | Bet   | Wit   | Int   | Bet   | Wit   | Int   |
| 30 | = | ARH(1) | 71.53 | 95.10 | 96.20 | 68.03 | 94.51 | 94.91 | 70.83 | 94.11 | 94.91 |
|    |   | RC     | 49.75 | 95.00 | 96.00 | 39.16 | 94.21 | 94.21 | 48.55 | 94.11 | 95.40 |
|    |   | UN     | 71.33 | 95.30 | 96.40 | 70.93 | 94.91 | 95.80 | 70.23 | 95.00 | 95.70 |
|    | + | ARH(1) | 94.81 | 67.23 | 94.71 | 68.13 | 95.50 | 94.71 | 66.93 | 94.81 | 96.40 |
|    |   | RC     | 43.66 | 96.80 | 96.00 | 36.26 | 95.70 | 94.41 | 44.06 | 95.90 | 96.90 |
|    |   | UN     | 65.73 | 96.70 | 96.40 | 68.93 | 95.80 | 95.50 | 55.03 | 95.70 | 97.10 |
|    | - | ARH(1) | 86.11 | 93.61 | 97.60 | 79.02 | 93.51 | 94.31 | 80.82 | 93.51 | 94.71 |
|    |   | RC     | 75.42 | 91.41 | 96.70 | 57.44 | 90.91 | 91.71 | 70.33 | 90.31 | 90.21 |
|    |   | UN     | 83.92 | 94.51 | 97.70 | 76.32 | 93.11 | 92.61 | 78.02 | 93.51 | 94.01 |
| 45 | = | ARH(1) | 51.55 | 94.11 | 96.30 | 49.55 | 93.61 | 95.20 | 50.75 | 93.61 | 95.70 |
|    |   | RC     | 21.78 | 95.10 | 95.00 | 16.48 | 93.51 | 93.11 | 21.18 | 93.51 | 95.30 |
|    |   | UN     | 51.85 | 95.30 | 95.50 | 54.45 | 94.91 | 94.51 | 50.85 | 95.00 | 95.10 |
|    | + | ARH(1) | 46.95 | 96.10 | 94.81 | 47.25 | 96.00 | 96.20 | 46.85 | 95.50 | 95.90 |
|    |   | RC     | 15.18 | 95.90 | 95.60 | 12.99 | 95.60 | 94.91 | 14.99 | 95.70 | 95.50 |
|    |   | UN     | 51.73 | 95.10 | 96.30 | 55.14 | 95.40 | 95.80 | 51.55 | 95.50 | 96.10 |
|    | - | ARH(1) | 70.03 | 93.51 | 96.40 | 65.43 | 91.61 | 95.10 | 67.63 | 92.41 | 95.10 |
|    |   | RC     | 45.85 | 93.71 | 95.10 | 34.37 | 93.31 | 92.11 | 41.96 | 93.41 | 91.91 |
|    |   | UN     | 71.33 | 94.91 | 95.20 | 67.03 | 94.11 | 92.01 | 67.73 | 94.21 | 93.91 |
| 60 | = | ARH(1) | 33.17 | 94.81 | 96.00 | 32.27 | 94.61 | 95.40 | 32.97 | 94.81 | 95.50 |
|    |   | RC     | 05.79 | 95.40 | 96.00 | 04.70 | 94.31 | 95.00 | 05.39 | 94.41 | 94.71 |
|    |   | UN     | 37.96 | 95.20 | 95.50 | 39.46 | 94.41 | 95.00 | 37.96 | 94.61 | 95.30 |
|    | + | ARH(1) | 31.87 | 95.20 | 95.90 | 32.37 | 96.00 | 94.91 | 31.87 | 95.60 | 94.71 |
|    |   | RC     | 04.10 | 94.91 | 95.20 | 03.40 | 94.91 | 95.40 | 04.10 | 95.00 | 95.50 |
|    |   | UN     | 34.37 | 94.81 | 95.20 | 36.76 | 93.71 | 95.30 | 34.27 | 93.81 | 95.60 |
|    | - | ARH(1) | 53.75 | 95.30 | 95.80 | 51.95 | 93.81 | 94.91 | 52.25 | 93.51 | 94.21 |
|    |   | RC     | 24.68 | 93.91 | 94.31 | 17.38 | 93.21 | 92.81 | 23.48 | 93.11 | 92.51 |
|    |   | UN     | 58.54 | 93.81 | 95.30 | 57.64 | 92.81 | 93.41 | 55.94 | 93.11 | 94.51 |

**Note:** Sample Size (N), Relationship between sample and dispersion matrix size (R), Null relation between sample and dispersion matrix size (=), Positive relation between sample and dispersion matrix size (+), Negative relation between sample and dispersion matrix size (-), Original Covariance Structure (OCS), Akaike's Information Criterion (AIC), Correctly Identified Model (MCI), Type I error rates exceeding Bradley's liberal criterion (Boldface).

Table 29: Percentages of Power when data are not normally distributed (Moderate Skewness -1,0,0,1) and trimmed at 0.2 for covariance structures selecting

| N  | R | OCS     | BF    |       |       | AIC   |       |       | CIM   |       |       |
|----|---|---------|-------|-------|-------|-------|-------|-------|-------|-------|-------|
|    |   |         | Bet   | Wit   | Int   | Bet   | Wit   | Int   | Bet   | Wit   | Int   |
| 30 | = | ARH(1)  | 69.73 | 95.90 | 98.30 | 67.13 | 94.31 | 97.20 | 68.63 | 94.01 | 98.20 |
|    |   | RC      | 48.65 | 95.30 | 97.30 | 40.06 | 92.81 | 94.11 | 46.75 | 92.61 | 95.50 |
|    |   | UN      | 68.73 | 95.40 | 96.40 | 67.93 | 93.01 | 95.20 | 68.33 | 92.81 | 96.50 |
|    | + | ARH (1) | 66.23 | 95.90 | 97.70 | 64.84 | 94.51 | 96.40 | 67.13 | 94.90 | 97.70 |
|    |   | RC      | 39.86 | 96.00 | 96.20 | 32.97 | 95.00 | 95.40 | 38.70 | 95.40 | 97.20 |
|    |   | UN      | 64.74 | 96.90 | 96.50 | 64.84 | 95.80 | 96.30 | 63.54 | 95.90 | 97.50 |
|    | - | ARH (1) | 84.72 | 94.51 | 97.40 | 76.42 | 89.81 | 95.50 | 77.22 | 89.61 | 96.30 |
|    |   | RC      | 77.12 | 94.21 | 96.70 | 58.14 | 87.14 | 89.71 | 67.43 | 87.61 | 91.41 |
|    |   | UN      | 84.42 | 94.21 | 97.50 | 77.82 | 91.21 | 95.60 | 78.62 | 91.11 | 95.60 |
| 45 | = | ARH(1)  | 47.95 | 96.10 | 96.90 | 48.45 | 94.61 | 96.80 | 47.55 | 94.41 | 97.30 |
|    |   | RC      | 17.88 | 94.21 | 95.70 | 15.78 | 92.01 | 92.91 | 17.28 | 92.31 | 93.51 |
|    |   | UN      | 53.15 | 95.60 | 96.90 | 53.55 | 94.31 | 95.80 | 52.75 | 94.31 | 95.70 |
|    | + | ARH (1) | 44.56 | 96.20 | 96.30 | 44.76 | 96.00 | 96.10 | 44.26 | 95.60 | 96.30 |
|    |   | RC      | 10.69 | 95.70 | 96.40 | 09.89 | 94.61 | 94.71 | 10.79 | 94.51 | 96.20 |
|    |   | UN      | 47.65 | 96.10 | 96.90 | 50.15 | 94.91 | 95.50 | 47.15 | 94.91 | 95.70 |
|    | - | ARH (1) | 67.53 | 95.20 | 97.70 | 65.03 | 91.21 | 95.80 | 64.84 | 91.41 | 96.00 |
|    |   | RC      | 44.46 | 93.81 | 95.20 | 33.27 | 90.81 | 92.31 | 39.76 | 91.11 | 92.11 |
|    |   | UN      | 70.93 | 93.51 | 96.40 | 67.63 | 89.41 | 94.91 | 66.93 | 90.01 | 96.30 |
| 60 | = | ARH(1)  | 36.26 | 94.51 | 96.40 | 35.26 | 93.11 | 96.60 | 35.96 | 92.91 | 96.30 |
|    |   | RC      | 05.29 | 95.60 | 95.10 | 04.40 | 93.81 | 93.91 | 05.09 | 94.01 | 94.21 |
|    |   | UN      | 46.20 | 94.61 | 96.10 | 42.06 | 93.71 | 95.50 | 39.96 | 93.41 | 95.60 |
|    | + | ARH (1) | 28.47 | 97.30 | 97.40 | 28.57 | 95.40 | 97.40 | 28.47 | 95.40 | 96.60 |
|    |   | RC      | 02.20 | 94.11 | 95.60 | 02.30 | 94.41 | 94.61 | 02.20 | 94.41 | 95.50 |
|    |   | UN      | 33.77 | 95.80 | 96.00 | 35.76 | 95.30 | 95.30 | 33.67 | 95.40 | 95.60 |
|    | - | ARH (1) | 52.45 | 94.11 | 96.20 | 49.15 | 92.01 | 95.80 | 50.25 | 91.51 | 94.81 |
|    |   | RC      | 21.28 | 94.41 | 95.60 | 15.68 | 90.81 | 92.31 | 18.88 | 90.81 | 92.61 |
|    |   | UN      | 55.34 | 94.11 | 97.10 | 55.84 | 91.31 | 95.70 | 53.75 | 91.51 | 95.90 |



**Note:** Sample Size (N), Relationship between sample and dispersion matrix size (R), Null relation between sample and dispersion matrix size (=), Positive relation between sample and dispersion matrix size (+), Negative relation between sample and dispersion matrix size (-), Original Covariance Structure (OCS), Akaike's Information Criterion (AIC), Correctly Identified Model (MCI), Type I error rates exceeding Bradley's liberal criterion (Boldface).

Table 30: Percentages of Power when data are not normally distributed (Strong Skewness -1,0,0,1) and trimmed at 0.2 for covariance structures selecting

| N  | R | OCS     | BF    |       |       | AIC   |       |       | CIM   |       |       |
|----|---|---------|-------|-------|-------|-------|-------|-------|-------|-------|-------|
|    |   |         | Bet   | Wit   | Int   | Bet   | Wit   | Int   | Bet   | Wit   | Int   |
| 30 | = | ARH(1)  | 62.34 | 96.00 | 98.00 | 57.24 | 94.21 | 98.10 | 58.94 | 93.91 | 98.30 |
|    |   | RC      | 32.57 | 96.20 | 97.70 | 26.57 | 93.51 | 96.30 | 28.57 | 93.91 | 96.40 |
|    |   | UN      | 63.84 | 96.50 | 98.50 | 63.14 | 94.91 | 97.00 | 60.84 | 95.00 | 97.80 |
|    | + | ARH (1) | 58.84 | 96.80 | 97.80 | 55.04 | 96.70 | 98.20 | 56.24 | 96.60 | 98.30 |
|    |   | RC      | 32.97 | 96.70 | 98.20 | 27.87 | 95.80 | 95.50 | 29.97 | 96.00 | 96.50 |
|    |   | UN      | 60.94 | 96.70 | 98.30 | 59.24 | 96.00 | 96.60 | 59.44 | 96.00 | 97.00 |
|    | - | ARH (1) | 76.32 | 95.50 | 98.70 | 67.13 | 92.61 | 96.90 | 69.83 | 93.01 | 96.50 |
|    |   | RC      | 58.04 | 95.30 | 98.20 | 43.76 | 90.71 | 95.50 | 47.25 | 90.81 | 96.20 |
|    |   | UN      | 76.92 | 95.30 | 98.10 | 70.23 | 92.21 | 97.10 | 69.43 | 92.81 | 97.80 |
| 45 | = | ARH(1)  | 41.76 | 95.40 | 98.10 | 39.36 | 94.21 | 97.40 | 40.36 | 94.11 | 97.70 |
|    |   | RC      | 11.59 | 96.00 | 98.40 | 09.99 | 95.00 | 96.30 | 10.69 | 94.71 | 96.30 |
|    |   | UN      | 44.86 | 95.50 | 97.70 | 43.96 | 93.41 | 96.70 | 43.76 | 93.71 | 97.10 |
|    | + | ARH (1) | 40.36 | 96.80 | 96.50 | 37.66 | 95.20 | 96.50 | 39.46 | 95.60 | 96.20 |
|    |   | RC      | 10.39 | 95.90 | 97.70 | 08.49 | 96.00 | 96.40 | 09.09 | 96.20 | 97.20 |
|    |   | UN      | 42.06 | 97.10 | 97.50 | 41.16 | 95.60 | 97.10 | 41.06 | 95.50 | 97.60 |
|    | - | ARH (1) | 55.14 | 94.41 | 98.40 | 50.35 | 91.91 | 97.00 | 50.05 | 91.91 | 96.70 |
|    |   | RC      | 28.27 | 94.21 | 97.00 | 21.38 | 91.21 | 92.51 | 23.88 | 91.71 | 93.21 |
|    |   | UN      | 57.44 | 95.10 | 97.90 | 55.24 | 91.31 | 96.30 | 54.05 | 91.41 | 96.30 |
| 60 | = | ARH(1)  | 28.57 | 95.00 | 96.80 | 27.07 | 94.71 | 95.90 | 27.97 | 94.51 | 95.50 |
|    |   | RC      | 04.80 | 95.60 | 96.90 | 04.10 | 93.91 | 95.40 | 04.20 | 94.41 | 95.20 |
|    |   | UN      | 29.37 | 95.20 | 97.00 | 29.67 | 93.81 | 95.70 | 29.07 | 93.51 | 96.30 |
|    | + | ARH (1) | 25.77 | 96.00 | 97.90 | 25.17 | 94.71 | 96.70 | 25.17 | 94.80 | 97.20 |
|    |   | RC      | 02.60 | 96.70 | 97.90 | 02.50 | 95.20 | 97.10 | 02.60 | 95.20 | 97.00 |
|    |   | UN      | 25.77 | 94.41 | 97.00 | 26.77 | 94.01 | 97.20 | 24.98 | 94.21 | 97.00 |
|    | - | ARH (1) | 38.66 | 95.30 | 98.10 | 35.16 | 91.71 | 97.00 | 35.26 | 91.61 | 97.40 |
|    |   | RC      | 12.79 | 94.01 | 95.10 | 10.99 | 90.21 | 92.61 | 10.89 | 90.41 | 92.61 |
|    |   | UN      | 44.36 | 96.40 | 97.00 | 43.56 | 93.41 | 96.10 | 42.16 | 93.71 | 96.20 |

**Note:** Sample Size (N), Relationship between sample and dispersion matrix size (R), Null relation between sample and dispersion matrix size (=), Positive relation between sample and dispersion matrix size (+), Negative relation between sample and dispersion matrix size (-), Original Covariance Structure (OCS), Akaike's Information Criterion (AIC), Correctly Identified Model (MCI), Type I error rates exceeding Bradley's liberal criterion (Boldface).
